# Supplementary material for: Growth characteristics of natural and planted Dahurian larch in northeast China
Source: Copernicus journal article supplement (doi:10.5194/essd-2017-99), 2017-10-12
Supplement: Supplementary file [file essd-2017-99-AC5-supplement.pdf]

1 Title: Growth characteristics of natural and planted Dahurian larch in northeast China

2

3 **Dear Referee #2:**

4 Thank you very much for your help to our manuscript! According to your suggestions, we  
5 revised our manuscript. All the modifications were listed as follows.

6

7 **Comment:** the climate change, although relevant, is not the only research field where the DataBase  
8 would be useful! Authors should improve this topic;

9 **Response:** Thank you for your suggestions, the importance of the Dataset was also emphasized on  
10 forest management and carbon sequestration in **Introduction**.

11 **Comment:** Authors should add some sentences commenting previous data collections;

12 **Response:** The previous data collections were commented in Lines 56-60.

13 **Comment:** The statistical section should be revised (see minor comments, too);

14 **Response:** P-value was added in Line 154 and 162.

15 **Comment:** Data stored in a pdf are not so easily accessible in order to perform some check.

16 **Response:** Data stored in an Excel form at <https://doi.org/10.1594/PANGAEA.880984>.

17 **Comment:** In the following lines, authors will find minor comments with the line number reference:

18 19 declare the meaning of DBH and use only the acronym in the rest of the manuscript;

19 **Response:** The meaning of DBH (i.e. diameter at breast height) was given in Line 20 and the  
20 acronym was used in the rest of the manuscript.

21 **Comment:** 22 (MAP)) double parenthesis;

22 **Response:** Line 22: climate (mean annual temperature (MAT) and mean annual precipitation  
23 (MAP)), in the sentence the double parenthesis is right.

24 **Comment:** 31 use Dahurian larch in the text, not the scientific name;

25 **Response:** The scientific name "*Larix gmelinii*" was substituted by "Dahurian larch" in the whole  
26 text.

27 **Comment:** 39 unclear please rephrase;

28 **Response:** "greenhouse effective" **was revised to** "greenhouse effect" in Line 40.

29 **Comment:** 41 add citation;

30 **Response:** The reference (Fang et al., 2001) was added in Line 43.

31 **Comment:** 44 see the previous comment;

32 **Response:** The reference (Yang, 2009) was added in Line 47.

33 **Comment:** 47 see the previous comment;

34 **Response:** The reference (Huang, 2011) was added in Line 51.

35 **Comment:** 53 unclear please rephrase;

36 **Response:** "For larch forests in northeast China, synthesis studies mainly focused on biomass and  
37 net primary production with increasing samples in recent decade" **was revised to** "Synthesis studies  
38 mainly focused on larch biomass and net primary production with increasing samples in recent  
39 decade in northeast China" in Lines 56-58.

40 **Comment:** 72 unclear please rephrase;

41 **Response:** "in Dahurian larch forests including natural and planted forests in order to develop a  
42 growth data set" **was revised to** "in natural and planted Dahurian larch forests in order to construct  
43 a growth data set" in Lines 75-77.

44 **Comment:** 79 check transparency, coordinate labels and scale bar in Figure 1;

45 **Response:** Line 84: The transparency, labels and scale bar were checked in Figure 1.

46 **Comment:** 84 add citation;

47 **Response:** Line 87: The distribution range of natural Dahurian larch was shown in Fig.1, which  
48 was from the dataset.

49 **Comment:** 88 data source or citation?

50 **Response:** Mean annual temperature and mean annual precipitation were from data sources in  
51 Lines 92-93.

52 **Comment:** 114 unclear: are these methods carried out by the authors or extracted from consulted  
53 sources?

54 **Response:** These methods were summarized from the dataset references in Line 119.

55 **Comment:** 130 check parenthesis;

56 **Response:** The parenthesis was checked in Line 135, and it was right.

57 **Comment:** 149 p-value is missing, moreover, it's not a correlation but a linear model;

58 **Response:** Lines 153-154:  $P < 0.001$  was added, and "establish the linear H-DBH correlation" **was**  
59 **revised to** "establish the H-DBH correlation with power function".

60 **Comment:** 155 p-value is missing;

61 **Response:**  $P < 0.001$  was added in Line 162.

62 **Comment:** 165 it's not a correlation;

63 **Response:** "H was estimated with the H-DBH correlation" **was revised to** "H was estimated with  
64 the H-DBH model" in Line 181.

65

66 Best regards

67

68 Sincerely yours,

69

70 Bingrui Jia and Guangsheng Zhou

# 1 Growth characteristics of natural and planted Dahurian larch in northeast China

2 Bingrui Jia<sup>1\*</sup> and Guangsheng Zhou<sup>2\*</sup>

3 <sup>1</sup>*State Key Laboratory of Vegetation and Environmental Change, Institute of Botany, Chinese*  
4 *Academy of Sciences, Beijing 100093, China,*

5 <sup>2</sup>*Chinese Academy of Meteorological Sciences, Beijing 100081, China,*

6 \*Corresponding author:

7 Bingrui Jia, Guangsheng Zhou

8 Institute of Botany, Chinese Academy of Sciences,

9 20 Nanxincun, Xiangshan, Haidian District, Beijing 100093, China

10 E-mail: jiabingrui@ibcas.ac.cn, gszhou@ibcas.ac.cn

11 Tel: 86-10-62836289, Fax: 86-10-82595962

12 **Abstract.** Dahurian larch (*Larix gmelinii* Rupr.) is the dominant species in both natural and  
13 planted forests in northeast China, which situated in the southernmost part of the global  
14 boreal forest biome and undergoing the greatest climatically induced changes. Published  
15 studies (1965–2015) on tree aboveground growth of Dahurian larch~~*Larix gmelinii*~~ forests in  
16 northeast China were collected in this study, critically reviewed, and a comprehensive growth  
17 data set was developed from 123 sites, which distributed between 40.85° N and 53.47° N in  
18 latitude, between 118.20° E and 133.70° E in longitude, between 130 m and 1260 m in  
19 altitude. The data set was composed of 776 entries, including growth data (mean tree height,  
20 mean diameter at breast height (DBH), mean tree volume and/or stand volume) and the  
21 associated information, i.e., geographical location (latitude, longitude, altitude, aspect and  
22 slope), climate (mean annual temperature (MAT) and mean annual precipitation (MAP)),  
23 stand description (origin, stand age, stand density and canopy density), and sample regime

24 (observing year, plot area and number). It would provide quantitative references for  
25 plantation management practices and boreal forest growth prediction under future climate  
26 change. The data set is freely available for noncommercial scientific applications, and the  
27 DOI for the data is <https://doi.org/10.1594/PANGAEA.880984>.

28

## 29 **1 Introduction**

30 Boreal forests, the second largest biome in the world, cover about one-third of the Earth's  
31 forest area ([Achard et al., 2006](#); Keenan et al., 2015). Dahurian larch (*Larix gmelinii* Rupr.) is  
32 a dominant tree species in Chinese boreal forest, which is distributed primarily in northeast  
33 China. Dahurian larch*Larix gmelinii* forest is also the predominant timber source in China,  
34 occupying 55% of Chinese boreal forest area and accounting for 75% of Chinese boreal  
35 forest volume (Xu, 1998; Zhou et al., 2002). Dahurian larch*Larix gmelinii* forest is situated in  
36 the southernmost part of the global boreal forest biome (Shugart et al., 1992) and undergoing  
37 the greatest climatically induced changes. Thus understanding the growth characteristics of  
38 Dahurian larch*Larix gmelinii* forest in China are of critical need for management and  
39 prediction under future climate change.

40 With increased greenhouse ~~effect~~<sup>effective</sup> and climate warming in recent years, forest  
41 carbon sink ~~has been paid~~<sup>is paid</sup> more and more attention by the world ([Bastin et al., 2017](#)).  
42 Forestation is the main measure to offset the greenhouse gas emission and increase carbon  
43 sink ([Fang et al., 2001](#)). China has the largest area of forest plantations in the world,  
44 approximately 79 million ha or one-fourth of world total (FAO, 2015; Payn et al., 2015). The  
45 forest cover showed an increasing trend through reforestation in northeast China (Achard et  
46 al., 2006). Dahurian larch*Larix gmelinii* is an important fast-growing and cold-tolerant tree  
47 species used in forestation in northeast China ([Yang, 2009](#)). Dahurian larch*Larix gmelinii* is  
48 usually planted after fire or logging. The growth rates of Dahurian larch*Larix gmelinii*

49 plantations are important indexes in the assessment of forest recovery processes and carbon  
50 sequestration potentials, which could supply strategies for post-fire or post-harvest  
51 management ([Huang, 2011](#)). The data set can provide basis for evaluating and predicting the  
52 carbon sequestration and its potential of the forestation activities.

53 Relating the easily measured variables (e.g. ~~DBH, tree height, diameter~~) to other  
54 structural and functional characteristics, is the most common and reliable method for  
55 estimating forest biomass, net primary production and biogeochemical budgets (Luo, 1996;  
56 Fang et al., 2001). ~~For larch forests in northeast China, synthesis~~ Synthesis studies mainly  
57 focused on larch biomass and net primary production with ~~a small quantity of increasing~~  
58 samples in recent decade in northeast China, for example, N=28 (Luo, 1996), N=17 (Wang et  
59 al., 2001a), N=18 (Wang et al., 2001b; Zhou et al., 2002), N=36 (Wang et al., 2005), N=83  
60 (Wang et al., 2008), N=50 (Zeng, 2015), N=150 (Zeng et al., 2017). However, large numbers  
61 of growth measurements (e.g. age, DBH, tree height, ~~DBH~~, volume) have scarcely been  
62 studied systematically at the large scale. Therefore, a comprehensive growth data set (N=776)  
63 of Dahurian larch in northeast China was developed in this paper.

64

## 65 **2 Data and methods**

### 66 **2.1 Research origin descriptors**

67 **(1) Identity:** Growth data set of natural and planted Dahurian larch in northeast China,  
68 version 1.0

69 **(2) Originators:**

70 Bingrui Jia, State Key Laboratory of Vegetation and Environmental Change, Institute of Botany,  
71 Chinese Academy of Sciences, Beijing 100093, China;

72 Guangsheng Zhou, Chinese Academy of Meteorological Sciences, Beijing 100081, China.

73 **(3) Period of Study:** From January 1965 to December 2015.

74 **(4) Objectives:** We conducted a complete literature ~~and book~~ review of published studies on  
75 age, DBH, tree height, DBH, and/or volume in natural and planted Dahurian larch*Larix*  
76 *gmelinii* forests ~~including natural and planted forests~~ in order to construct~~develop~~ a growth  
77 data set. The data set can be used to analyze growth characteristics of Dahurian larch*Larix*  
78 *gmelinii* forests and assess their potential productivity in future climate warming.

## 79 2.2 Site description

80 **(1) Site type:** Data were derived from 123 study sites in northeastern China. This region  
81 includes Heilongjiang, Liaoning, Jilin provinces and the eastern part of Inner Mongolia  
82 Autonomous Region (Fig. 1).

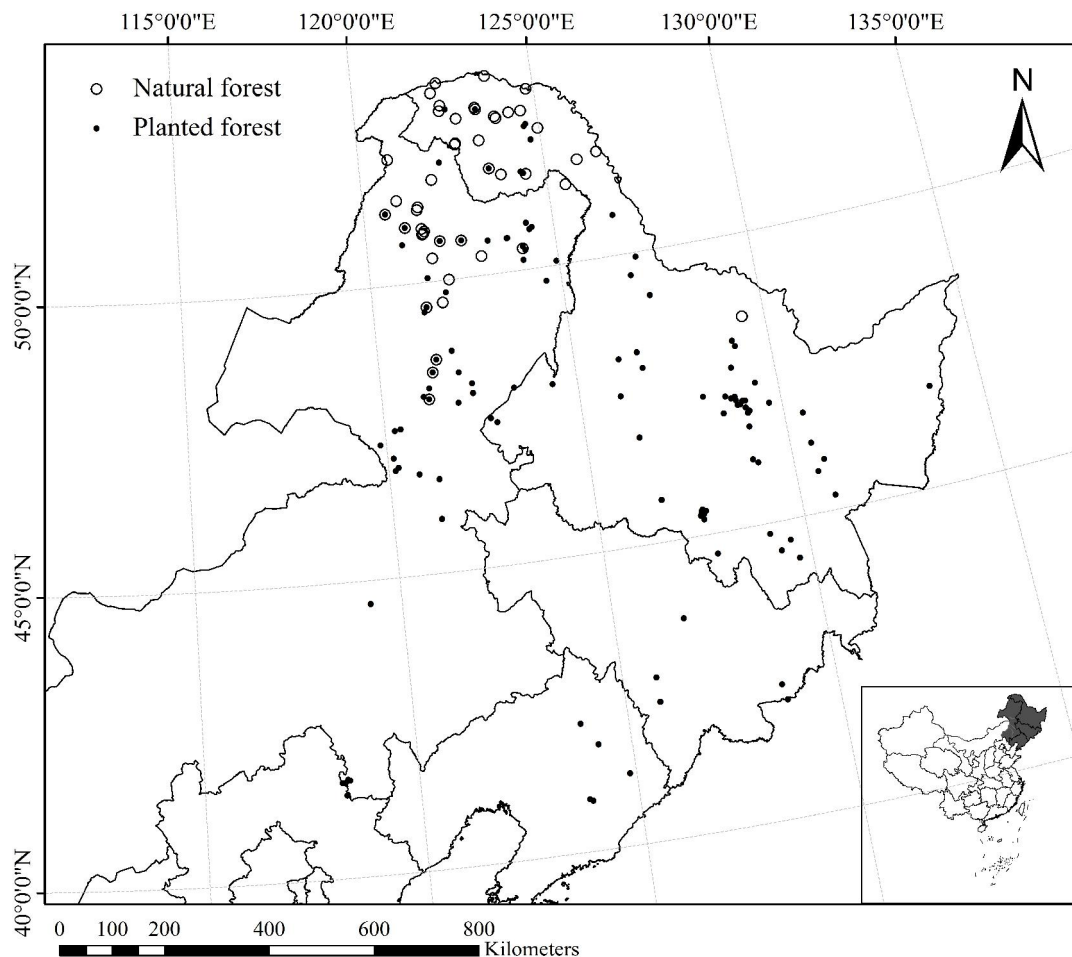

84 Figure 1. Study sites of Dahurian larch*Larix gmelinii* across northeastern China, including  
85 Heilongjiang, Liaoning, Jilin provinces and the eastern part of Inner Mongolia Autonomous  
86 Region. Open circles represent natural forests and dots represent planted forests.

87 | **(2) Habitat:** Dahurian larch~~*Larix gmelinii*~~ forest is naturally distributed in Great Xing'an  
88 | Mountains of northeastern China. Dahurian larch~~*Larix gmelinii*~~ was usually planted in barren  
89 | hills, post-fire or post-harvest area in northeast China.

90 | **(3) Climate:** The climate in northeast China is controlled by the high latitude East Asia  
91 | monsoon, changing from cool temperate to temperate zones from north to south, and from  
92 | semi-arid to humid zones from west to east. Mean annual temperature (MAT) for these sites  
93 | ranged from -6.1 to 7.0 °C, and mean annual precipitation (MAP) from 355 to 926 mm.

### 94 | **2.3 Data sources**

95 | Published studies (1965-2015) were collected from available online full-text databases,  
96 | including China Knowledge Resource Integrated Database (<http://www.cnki.net/>), China  
97 | Science and Technology Journal Database (<http://www.cqvip.com/>), Wanfang Data  
98 | Knowledge Service Platform (<http://www.wanfangdata.com/>), ScienceDirect (<http://www.sciencedirect.com/>), ISI Web of Science (<http://isiknowledge.com/>) and Springer Link  
100 | (<http://link.springer.com/>). The different combination of the terms “Dahurian larch (or *Larix*  
101 | *gmelinii*)” with “height”, “diameter at breast height (or DBH)”, “tree volume” and-or “stand  
102 | volume” were searched in full text. Meanwhile, we also looked up the related books (e.g. Ma,  
103 | 1992; Wang, 1992; Zhou, 1994; Yang, 2009). We attempted to compile a complete growth  
104 | data set of natural and planted Dahurian larch in northeastern part of China (between 40.85°  
105 | N and 53.47° N; between 118.20°E and 133.70° E).

### 106 | **2.4 Data collection criteria**

107 | A critical review of the literatures collected from the above-mentioned sources was  
108 | conducted to obtain reliable growth data using the following criteria:

109 | **(1) Scope:** The objective of this study was to provide the data for understanding growth  
110 | characteristics of Dahurian larch~~*Larix gmelinii*~~ natural forests (pure Dahurian larch~~*Larix*~~  
111 | ~~*gmelinii*~~ or its proportion more than 50%) and monoculture plantations. Forest stands



112 included in the data set were restricted to those not recently disturbed by logging, fire, or  
113 insect pests. Additionally, the following small numbers of special types were excluded: (i)  
114 Dahurian larch~~*Larix gmelinii*~~ afforestation in wetland (Li et al., 1985; Song & Li, 1990;  
115 Huang, 2011; Cui et al., 2013), pastureland (Duan, 2005), or abandoned mine land (Yang et  
116 al., 2013); (ii) hybrid test between Dahurian larch~~*Larix gmelinii*~~ and other larch (Deng et al.,  
117 2010; Zhang et al., 2005); (iii) low-yield stands in hard environment, ~~e.g. igneous rock forest~~  
118 (Wang et al., 1979), ~~old man forest~~ (Wang et al., 1991).

119 **(2) Study design and sampling:** DBH and tree height ~~and DBH~~ were averaged from the  
120 measurement values of all trees in plots or with random/systematic sampling method. Tree  
121 regeneration layer, generally below 5 cm in DBH or 1.3 m in height, was neglected in  
122 sampled plots. Stem volume of individual tree was computed from felled-wood samples or  
123 local tree volume equations. Stand volume was usually calculated by multiplying mean  
124 individual volume with stand density. Besides the growth data (i.e. DBH, height ~~DBH~~ and/or  
125 volume), the necessary information should be provided in the original sources, e.g., stand age,  
126 stand origin, study site, etc.

127 **(3) Quality control:** The data quality has been carefully reviewed by the authors. Data has  
128 undergone substantial checking, for example, cross-check for the relevant information from  
129 different sources, preliminary correlation analysis among growth variables.

130 Consequently, 776 records that met the above criteria were selected to develop a  
131 comprehensive growth data set of Dahurian larch in China. The data set includes growth  
132 characteristics of Dahurian larch (i.e. mean tree height (m), mean DBH (cm), mean tree  
133 volume ( $10^{-3} \text{ m}^3$ ) and/or stand volume ( $\text{m}^3/\text{ha}$ )). In addition, associate information was  
134 included, if available in original sources or ascertainable from other relevant literatures, i.e.,  
135 geographical location (province location and locality name of study site, latitude ( $^{\circ}$ ),  
136 longitude ( $^{\circ}$ ), altitude (m), aspect and slope ( $^{\circ}$ )), stand description (origin, stand age (years),

137 stand density (trees/ha) and canopy density), climate (mean annual temperature (MAT, °C)  
 138 and mean annual precipitation (MAP, mm)), and sample regime (observing year, plot size and  
 139 number).

## 140 2.5 Data structural descriptors

141 Table 1 Variable information in the data set.

| Column code | Definition                                                                                                                                                                                                            | Unit                                  | Number             | Range                    |
|-------------|-----------------------------------------------------------------------------------------------------------------------------------------------------------------------------------------------------------------------|---------------------------------------|--------------------|--------------------------|
| ID          | Unique identification number of each record                                                                                                                                                                           | N/A                                   | 776                | 1—776                    |
| Province    | Province location of study site                                                                                                                                                                                       | N/A                                   | 776 <sup>4</sup>   | N/A                      |
| Study site  | Locality name of study site                                                                                                                                                                                           | N/A                                   | 123                | N/A                      |
| Latitude    | Latitude of study site                                                                                                                                                                                                | °                                     | 776                | 40.85—53.47              |
| Longitude   | Longitude of study site                                                                                                                                                                                               | °                                     | 776                | 118.20—133.70            |
| Altitude    | Altitude of study site                                                                                                                                                                                                | m                                     | 776                | 130—1260                 |
| Aspect      | Slope direction of study site, including flat slope (FL), sunny slope (SU: South), half-sunny slope (HSU: West, Southwest, Southeast), shady slope (SH: North) and half-shady slope (HSH: East, Northwest, Northeast) | N/A                                   | 300                | N/A                      |
| Slope       | Slope degree of study site                                                                                                                                                                                            | °                                     | 357                | 0—60                     |
| Origin      | Stand origin was classified into natural and planted forests                                                                                                                                                          | N/A                                   | 776                | N/A                      |
| MAT         | Mean annual temperature, from original study or other related reference                                                                                                                                               | °C                                    | 776                | -6.1—7.0                 |
| MAP         | Mean annual precipitation, from original study or other related reference                                                                                                                                             | mm                                    | 776                | 355—926                  |
| Age         | Stand age, which is generally defined as age since germination in natural forest and since planting in planted forest. Stand age is usually obtained from historical records or tree rings.                           | years                                 | 776                | 1—280                    |
| Height      | Mean tree height                                                                                                                                                                                                      | m                                     | 670                | 0.24—29.40               |
| DBH         | Mean diameter at breast height, base diameter was only given in some young forests and marked with <sup>B</sup>                                                                                                       | cm                                    | 661 <sup>697</sup> | 0.70—34.89               |
| $V_{tree}$  | Mean tree volume, the estimated tree volume data from the two-variable larch equation were marked with <sup>E</sup>                                                                                                   | 10 <sup>-3</sup> m <sup>3</sup> /tree | 696                | 0.04—93 <del>5.736</del> |
| $V_{stand}$ | Stand volume, the estimated stand volume data from the estimated tree volume and stand density were marked with <sup>E</sup>                                                                                          | m <sup>3</sup> /ha                    | 590                | 0.07—975 <del>32</del>   |
| Density     | Stand density/Canopy density, planting density was only given in some studies and marked with <sup>P</sup>                                                                                                            | trees/ha<br>%                         | 656<br>150         | 213—13275<br>0.2—1.0     |
| Area        | Plot area                                                                                                                                                                                                             | m <sup>2</sup>                        | 397                | 50—10000                 |
| Plot        | Plot numbers, i.e. replications                                                                                                                                                                                       | N/A                                   | 573                | 1—25                     |
| Year        | Investigation year                                                                                                                                                                                                    | N/A                                   | 533                | 1954—2014                |
| Reference   | Data sources, the sources used to supplement climate information lacking in the original publications were added asterisks.                                                                                           | N/A                                   | 226                | 1965—2015                |

## 142 3 Data estimates and evaluation

### 143 3.1 Geographical location

144 Google Earth (Version: 7.1.8.3036) was used to estimate latitude, longitude, and/or altitude  
 145 when the geographic coordinates was unavailable in original sources.

146 **3.2 Tree and stand volume**

147 The missing tree and stand volumes were estimated with the available information (mean  
148 DBH, mean tree height and stand density). Stem volume of individual tree was calculated  
149 with the larch equation in northeast China ( $V_{tree} = 0.000050168241 \text{ DBH}^{1.7582894} \text{ H}^{1.1496653}$ ),  
150 the best method recommended by the ministry standard of China: Tree volume tables (LY  
151 | 208-77) ([Agriculture and Forestry Ministry of ChinaForestry Administration of China](#), 1978;  
152 | Liu, 2017). Meanwhile, available 590 pairs of mean tree height and mean DBH in the data set  
153 | were used to establish the ~~linear~~-H-DBH correlation with power function ( $R^2=0.83778919$ ,  
154 |  $P<0.001$ , see Fig. 2). To calculate tree volume from only one known variable of DBH, tree  
155 | height was firstly calculated with the ~~power~~~~linear~~ H-DBH equation in Fig. 2. The estimated  
156 | stand volume was determined by multiplying the estimated tree volume with stand density.

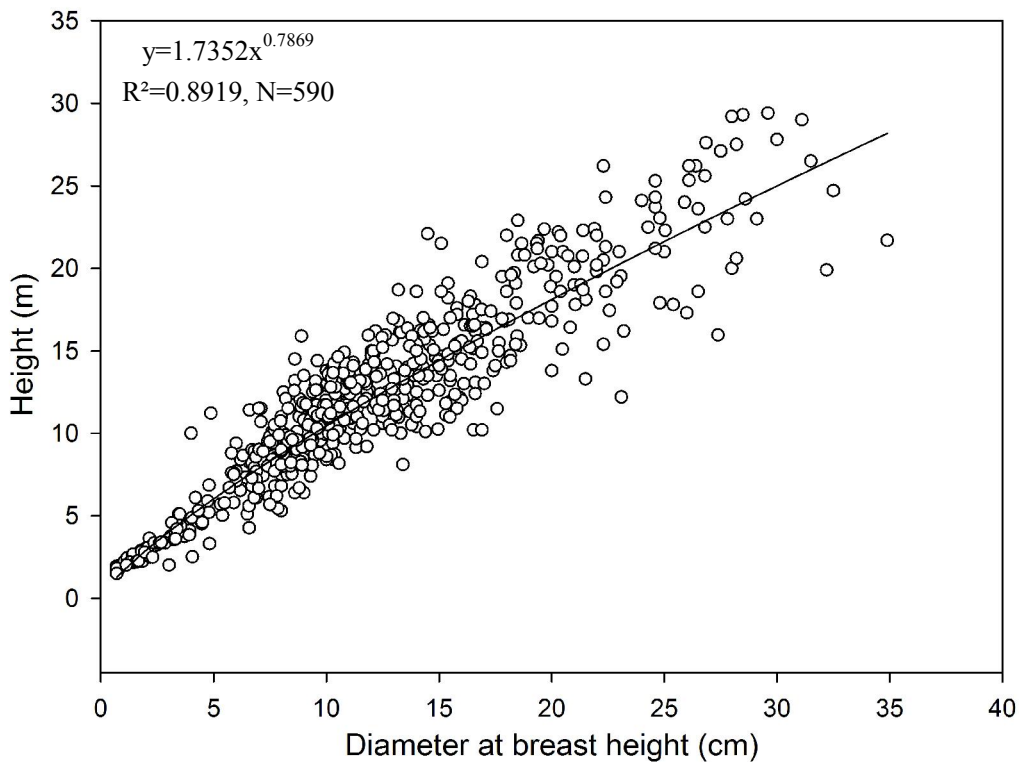

157

158 Figure 2. Relationship between mean tree height and diameter at breast height in the data set.

159

160 The accuracy of tree volume was assessed by comparing the extracted data from references  
 161 with the calculated data from the above-mentioned two-variable tree volume equation (Fig. 3).  
 162 The coefficient of determination ( $R^2$ ) was 0.9724 ( $P<0.001$ ) and the slope was 1.07370733.  
 163 Therefore, we were confident in applying the larch volume equation to interpolate tree and  
 164 stand volume data in this study.

165

166

167

168

169

170

171

172

173

174

175

176

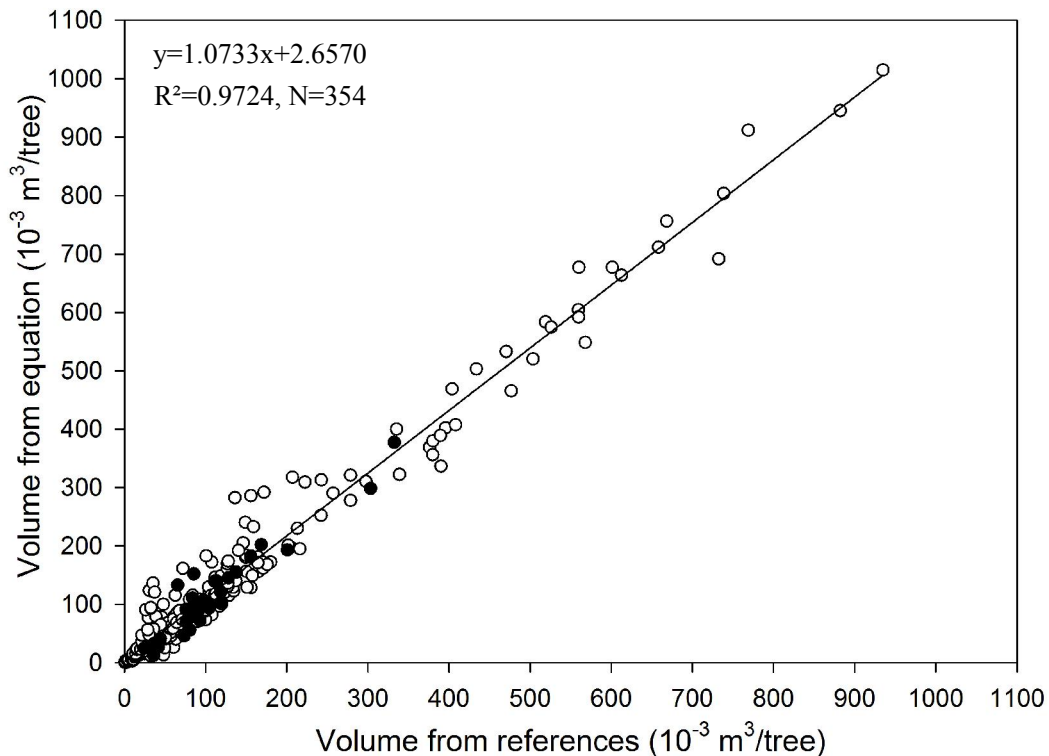

177 Figure 3. Comparison of available tree volume from references with simulated values from  
 178 the two-variable tree volume equation ( $V_{tree}=0.000050168241 \text{ DBH}^{1.7582894} \text{ H}^{1.1496653}$ ). Open  
 179 circles (N=317): tree height (H) and diameter at breast height (DBH) were available in the  
 180 references, solid circles (N=37): DBH was only available in the references and H was  
 181 estimated with the H-DBH correlation-model from Fig. 2.

182

183 **Acknowledgements.** We would like to acknowledge ~~the~~ many scientists and researchers  
 184 whose field measurements made this work possible. This research was supported by the

185 National Key Research and Development Program of China (2017YFC0503906) and China  
186 Special Fund for Meteorological Research in the Public Interest (GYHY201406034).

## 187 References

- 188 [Achard, F., Mollicone, D., Stibig, H., Aksenov, D., Laestadius, L., Li, Z., Popatov, P., and](#)  
189 [Yaroshenko, A.: Areas of rapid forest-cover change in boreal Eurasia, \*Forest Ecology and\*](#)  
190 [Management, 237, 322-334, <https://doi.org/10.1016/j.foreco.2006.09.080>, 2006.](#)
- 191 [Agriculture and Forestry Ministry of China: Tree Volume Tables \(LY 208-77\), Standard Press](#)  
192 [of China, Beijing, China, 1978.](#)
- 193 [Bastin, J.F., Berrahmouni, N., Grainger, A., Maniatis, D., Mollicone, D., Moore, R., Patriarca,](#)  
194 [C., Picard, N., Sparrow, B., Abraham, E.M., Aloui, K., Atesoglu, A., Attore, F., Bassüllü, Ç.,](#)  
195 [Bey, A., Garzuglia, M., García-Montero, L.G., Groot, N., Guerin, G., Laestadius, L., Lowe,](#)  
196 [A.J., Mamane, B., Marchi, G., Patterson, P., Rezende, M., Ricci, S., Salcedo, I., Diaz,](#)  
197 [A.S.P., Stolle, F., Surappaeva, V., and Castro, R.: The extent of forest in dryland biomes,](#)  
198 [Science, 356, 635-638. <https://doi.org/10.1126/science.aam6527>, 2017.](#)
- 199 Cui, W., Mu, C. C., Lu, H. C., Bao, X., and Wang, B.: Effects of draining for forestation on  
200 carbon storage of wetland ecosystem in Daxing'an Mountains of northeastern China,  
201 Journal of Beijing Forestry University, 35(5), 28-36, [https://doi.org/10.13332/j.1000-1522.](https://doi.org/10.13332/j.1000-1522.2013.05.020)  
202 2013.05.020, 2013.
- 203 Deng, J. F., Zhang, H. G., Zhang, L., Guan, C. Y., and Zhang, L.: Genetic variation of  
204 17-year-old hybrid larch and its superior family selection, Journal of Northeast Forestry  
205 University, 38(1), 8-11, <https://doi.org/10.13759/j.cnki.dlxb.2010.01.017>, 2010.
- 206 Duan, W. B.: Suitable types of soils for main tree species of Shelterbelts on pastureland,  
207 Chinese Journal of Soil Science, 36(6), 871-876, [https://doi.org/10.19336/j.cnki.trtb.](https://doi.org/10.19336/j.cnki.trtb.2005.06.012)  
208 2005.06.012, 2005.
- 209 Fang, J., Chen, A., Peng, C., Zhao, S., Ci, L.: Changes in forest biomass carbon storage in  
210 China between 1949 and 1998, Science, 292(5525), 2320-2322, [https://doi.org/10.1126/](https://doi.org/10.1126/science.1058629)  
211 [science.1058629](https://doi.org/10.1126/science.1058629), 2001.
- 212 FAO: Global Forest Resources Assessment 2015, UN Food and Agriculture Organization,  
213 Rome, Italy, available at: <http://www.fao.org/3/a-i4808e.pdf>, last access: 8 October 2017,  
214 2015.
- 215 Huang, D. Q.: Biomass and carbon storage estimation of *Larix gmelinii*, Thesis, available at:  
216 <http://d.wanfangdata.com.cn/Thesis/Y2026419>, last access: 8 October 2017, 2011.
- 217 Keenan, R. J., Reams, G. A., Achard, F., de Freitas, J. V., Grainger, A., and Lindquist, E.:  
218 Dynamics of global forest area: Results from the FAO Global Forest Resources  
219 Assessment 2015, Forest Ecology and Management, 352, 9-20, [https://doi.org/10.1016/](https://doi.org/10.1016/j.foreco.2015.06.014)  
220 [j.foreco.2015.06.014](https://doi.org/10.1016/j.foreco.2015.06.014), 2015.
- 221 Li, J. C., Zhao Y. Y., Gao Y. Q., and Liu G. L.: A preliminary analysis of changes in ecological  
222 factors after reforestation in swamp land, Scientia Silvae Sinicae, 21(1), 80-85, available at:  
223 <http://www.cnki.com.cn/Article/CJFDTOTAL-LYKE198501009.htm>, last access: 8  
224 October 2017, 1985.
- 225 Liu, Q. J.: Tree volume tables of China, China Forestry Publishing House, Beijing, China,

226 2017.

227 Luo, T. X.: Patterns of net primary productivity for Chinese major forest types and their  
 228 mathematical models, Thesis, available at: [http://cdmd.cnki.com.cn/Article/CDMD-](http://cdmd.cnki.com.cn/Article/CDMD-80061-2006113572.htm)  
 229 80061-2006113572.htm, last access: 8 October 2017, 1996.

230 Ma, C. G.: Selection of optimum species and seed sources for plantations of larch, Beijing  
 231 Agricultural university press, Beijing, China, 1992.

232 Payn, T., Carnus, J. M., Freer-Smith, P., Kimberley, M., Kollert, W., Liu, S. R., Orazio, C.,  
 233 Rodriguez, L., Silva, L. N., and Wingfield, M. J.: Changes in planted forests and future  
 234 global implications, *Forest Ecology and Management*, 352, 57-67, [https://doi.org/10.1016/](https://doi.org/10.1016/j.foreco.2015.06.021)  
 235 [j.foreco.2015.06.021](https://doi.org/10.1016/j.foreco.2015.06.021), 2015.

236 Shugart, H. H., Leemans, R., and Bonan, G. B.: A system analysis of the global boreal forest,  
 237 Cambridge University Press, Cambridge, 1-10, 1992.

238 Song, X. S. and Li, Y. M.: Study on the effect of improvement of fen land and afforestation of  
 239 *Larix gmelinii*, *Forestry Science & Technology*, 6, 5-7, [https://doi.org/10.13456/j.cnki.lykt.](https://doi.org/10.13456/j.cnki.lykt.1990.06.003)  
 240 1990.06.003, 1990.

241 Wang, H. Q., Wu, J. C., Yang, W. B., Wang, S. T., and Song, C. J.: A research on management  
 242 and utilization of "old man forest" of *Larix gmelinii*, *Forestry Science & Technology*, 16(3),  
 243 12-14, available at: <http://www.cnki.com.cn/Article/CJFDTOTAL-LYKJ199103003.htm>,  
 244 last access: 8 October 2017, 1991.

245 Wang, W. J., Zu, Y. G., Wang, H. M., Matsuura, Y., Sasa, K., and Koike, T.: Plant biomass and  
 246 productivity of *Larix gmelinii* forest ecosystems in Northeast China: intra- and inter-  
 247 species comparison, *Eurasian Journal of Forest Research*, 8, 21-41, available at:  
 248 <http://hdl.handle.net/2115/22188>, last access: 8 October 2017, 2005.

249 Wang, X. P., Fang, J. Y., and Zhu, B.: Forest biomass and root-shoot allocation in northeast  
 250 China, *Forest Ecology and Management*, 255, 4007-4020, [https://doi.org/10.1016/j.foreco.](https://doi.org/10.1016/j.foreco.2008.03.055)  
 251 2008.03.055, 2008.

252 Wang, Y. H., Zhou, G. S., and Jiang, Y. L.: Simulation of NPP and evaluation of ecosystem  
 253 services of *Larix gmelinii* forest, *Chinese Journal of Applied Ecology*, 12(5), 648-652,  
 254 <https://doi.org/10.13287/j.1001-9332.2001.0157>, 2001a.

255 Wang, Y. H., Zhou, G. S., Jiang, Y. L., and Yang, Z. Y.: Estimating biomass and NPP of Larix  
 256 forests using forest inventory data(FID), *Acta Phytoecologica Sinica*, 25(4), 420-425,  
 257 available at: <http://www.cnki.com.cn/Article/CJFDTOTAL-ZWSB200104006.htm>, last  
 258 access: 8 October 2017, 2001b.

259 Wang, Z.: Larch Forest in China, China Forestry Publishing House, Beijing, China, 1992.

260 Wang, Z., Xu, Z. B., Tan, Z. X., and Dai, H. C.: Ecological characteristics of *Larix gmelinii*  
 261 grown in igneous rock in Aershan forest region, *Scientia Silvae Sinicae*, 4, 300-303,  
 262 available at: <http://www.cnki.com.cn/Article/CJFDTOTAL-LYKE197904010.htm>, last  
 263 access: 8 October 2017, 1979.

264 Xu, H.: Forests in Daxinganling Mountains China, Science Press, Beijing, China, 22-53,  
 265 1998.

266 Yang, C. P.: Study on the provenance of Dahurian larch, Science Press, Beijing, China, 2009.

267 Yang, Y., Zhang, K., Cai, T. J., and Gu, J. F.: Effect of afforestation species on soil nutrient in  
 268 dumping site of open coal mine in Daxing'an Mountain, *Journal of Northeast Forestry*  
 269 *University*, 41(9), 54-58, <https://doi.org/10.13759/j.cnki.dlxb.2013.09.028>, 2013.

- 270 [Zeng, W. S.: Integrated individual tree biomass simultaneous equations for two larch species](#)  
271 [in northeastern and northern China, Scandinavian Journal of Forest Research, 30\(7\),](#)  
272 [594-604, <https://doi.org/10.1080/02827581.2015.1046481>, 2015.](#)
- 273 [Zeng, W. S., Duo, H. R., Lei, X. D., Chen, X. Y., Wang, X. J., Pu, Y., and Zou, W. T.:](#)  
274 [Individual tree biomass equations and growth models sensitive to climate variables for](#)  
275 [Larix spp. in China, European Journal of Forest Research, 136 \(2\), 233-249,](#)  
276 [https://doi.org/10.1007/s10342-017-1024-9, 2017.](#)
- 277 Zhang, H. G., Zhang, C. L., Lan, S. B., Kang, Y. K., and Pan, B. L.: The analysis and  
278 selection for families of hybrid larch, Journal of Nanjing Forestry University: Natural  
279 Science Edition, 29(3), 69-72, <https://doi.org/10.3969/j.issn.1000-2006.2005.03.017>, 2005.
- 280 Zhou, G. S., Wang, Y. H., Jiang, Y. L., and Yang, Z. Y.: Estimating biomass and net primary  
281 production from forest inventory data: a case study of China's Larix forests, Forest  
282 Ecology and Management, 169(1-2), 149-157, [https://doi.org/10.1016/s0378-1127\(02\)](https://doi.org/10.1016/s0378-1127(02)00305-5)  
283 [00305-5](#), 2002.
- 284 Zhou, X. F.: Long-Term Research on China's Forest Ecosystems, Northeast Forestry  
285 University Press, Harbin, China, 1994.

#### 286 **References cited in the dataset**

- 287 An, J.: Tree species and management effect on soil carbon sequestration and fertilities of  
288 plantation forests. Thesis, available at: [http://cdmd.cnki.com.cn/Article/CDMD-10225-](http://cdmd.cnki.com.cn/Article/CDMD-10225-1012445928.htm)  
289 [1012445928.htm](#), last access: 8 October 2017, 2011.
- 290 Bi, Y. H.: Study on stand growth models of larch *gmelinii* with different thinning intensity.  
291 Thesis, available at: <http://cdmd.cnki.com.cn/Article/CDMD-10225-2001005669.htm>, last  
292 access: 8 October 2017, 2001.
- 293 Cao, G. Z.: Analysis of hydrological characteristics and change trend in western region of  
294 Songhua River Basin. Thesis, available at: [http://cdmd.cnki.com.cn/Article/CDMD-10183-](http://cdmd.cnki.com.cn/Article/CDMD-10183-1011098650.htm)  
295 [1011098650.htm](#), last access: 8 October 2017, 2011
- 296 Chen, J. D., Pan, B. L., Wu, M. C., Han, C. W., and Yan, W. F.: A summary report on the  
297 introduction of *Larix principis-rupprechtii*, Forestry Science & Technology, 4, 2-5,  
298 available at: <http://www.cnki.com.cn/Article/CJFDTOTAL-LYKJ198304000.htm>, last  
299 access: 8 October 2017, 1983.
- 300 Chen, L. X. and Xiao, Y.: Evolution and evaluation of soil fertility in forest land in *Larix*  
301 *gmelinii* plantations at different development stages in Daxinganling forest region, Science  
302 of Soil and Water Conservation, 4(5), 50-55, <https://doi.org/10.16843/j.sswc.2006.05.012>,  
303 2006.
- 304 Chen, Q., Zhao, Y. S., Xin, Y., Han, X. C., Xia, X. Y., and Han, C. H.: Plant species diversity  
305 and correlation with soil factors after vegetation restoration in burned area of Great  
306 Xing'an Mountains, Bulletin of Soil and Water Conservation, 32(6), 61-65, 70,  
307 <https://doi.org/10.13961/j.cnki.stbctb.2012.06.040>, 2012a.
- 308 Chen, Q., Zhao, Y. S., Xin, Y., and Han, X. C.: Litter and soil water-holding capacity of  
309 burned area in northern slope of the Great Khingan after vegetation restoration, Chinese  
310 Journal of Soil Science, 44(2), 308-313, <https://doi.org/10.19336/j.cnki.trtb.2013.02.008>,  
311 2013.
- 312 Chen, R. M.: A preliminary report on provenance trials of *Larix gmelinii*, Forest Investigation

313 Design, 1, 45-49, available at: <http://www.cnki.com.cn/Article/CJFDTOTAL->  
314 LYKC198901014.htm, last access: 8 October 2017, 1989.

315 Chen, X. W., Wang, C. H., Ding, B. Y., and Zhang, S. Y.: Dynamic thinning system for larch  
316 plantation, Journal of Northeast Forestry University, 5(2), 17-21,  
317 <https://doi.org/10.1007/BF02843226>, 1994.

318 Chen, Y. L., Han, S. J., Zhou, Y. M., Zou, C. J., and Zhang, J. H.: Characteristics of available  
319 P in the rhizosphere soil in pure *Juglans mandshurica* and *Larix gmelinii* and their mixed  
320 plantation, Chinese Journal of Applied Ecology, 13(7), 790-794, [https://doi.org/10.13287/](https://doi.org/10.13287/j.1001-9332.2002.0188)  
321 j.1001-9332.2002.0188, 2012b.

322 Cheng, F. Y.: Spatial variations in non-structural carbonhydrates of *Larix gmelinii*, *Juglans*  
323 *mandshurica* and *Ulmus japonica*. Thesis, available at: <http://cdmd.cnki.com.cn/Article/>  
324 CDMD-10225-1015665453.htm, last access: 8 October 2017, 2015.

325 Cheng, Y. X. and Li, Z. X.: Preliminary study of biomass of three forest types of *Larix*  
326 *gmelinii*, Inner Mongolia Forestry Investigation and Design, 4, 29-39, available at:  
327 <http://www.cqvip.com/QK/90816X/198904/206948.html>, last access: 8 October 2017,  
328 1989.

329 Chu, X.: Spatial and temporal distribution of fine root biomass of dominant tree species and  
330 changes after fire on Great Xing'an Mountains. Thesis, available at:  
331 <http://cdmd.cnki.com.cn/Article/CDMD-10225-1011147000.htm>, last access: 8 October  
332 2017, 2011.

333 Chu, X., Di, X. Y., Zhang, J. L., Cai, H. Y., and Yan, B. Z.: Distribution and seasonal  
334 dynamics of fine root biomass of two types of forests in Great Xing'an Mountains, Journal  
335 of Northeast Forestry University, 39(5), 36-39, [https://doi.org/10.13759/j.cnki.dlxb.](https://doi.org/10.13759/j.cnki.dlxb.2011.05.033)  
336 2011.05.033, 2011.

337 Cui, G. F., Cai, T. J., and Yang, W. H.: Soil acidity of *Larix gmelinii* plantation, Journal of  
338 Beijing Forestry University, 22(3), 33-36, [https://doi.org/10.13332/j.1000-1522.2000.03.](https://doi.org/10.13332/j.1000-1522.2000.03.008)  
339 008, 2000.

340 Di, X. Y., Geng, Y. Y., Sun, L., and Hu, H. Q.: Soil microbial biomass dynamics and influence  
341 factors in *Larix gmelinii* forest in Daxing'an Mountains, Journal of Northeast Forestry  
342 University, 40(5), 1-4, <https://doi.org/10.13759/j.cnki.dlxb.2012.05.009>, 2012.

343 Ding, B. Y.: The method and intensity of intermediate cuttings for larch plantation, Journal of  
344 Northeast Forestry University, 16(2), 46-57, [https://doi.org/10.13759/j.cnki.dlxb.1988.02.](https://doi.org/10.13759/j.cnki.dlxb.1988.02.007)  
345 007, 1988.

346 Ding, B. Y., Ju, Y. G., Zhang, S. S., Zhang, S. Y., and Yu, W. J.: Study on the structure of the  
347 larch wood community, Journal of North-Eastern Forestry Institute, 4, 11-23,  
348 <https://doi.org/10.13759/j.cnki.dlxb.1982.04.002>, 1982.

349 Ding, B. Y., Liu, S. R., and Cai, T. J.: Studies on biological productivity of artificial forests of  
350 Dahurian larches, Acta Phytocologica et Geobotanica Sinica, 14(3), 226-236, available at:  
351 <http://www.cnki.com.cn/Article/CJFDTOTAL-ZWSB199003003.htm>, last access: 8  
352 October 2017, 1990.

353 Dong, X. B.: The impacts of cutting intensity on the growth of larch forest, Journal of  
354 Northeast Forestry University, 29(1), 44-47, [https://doi.org/10.13759/j.cnki.dlxb.2001.01.](https://doi.org/10.13759/j.cnki.dlxb.2001.01.011)  
355 011, 2001.

356 Dong, X. B.: Modes and evaluation of ecological harvesting in Larch plantation areas. Thesis,



357 available at: <http://cdmd.cnki.com.cn/Article/CDMD-10225-2009132292.htm>, last access:  
358 8 October 2017, 2008.

359 Dong, X. B., Yang, X. C., and Yang, G. X.: Impacts of different cutting modes on soil  
360 properties in Larch plantations, *Journal of Northeast Forestry University*, 35(10), 7-10,  
361 <https://doi.org/10.13759/j.cnki.dlxb.2007.10.012>, 2007.

362 Dong, Y.: A survey study on the factors influencing the growth of *Larix gmelinii* and *Pinus*  
363 *sylvestris* plantations, *Transactions of China Pulp and Paper*, Suppl., 134-142,  
364 <https://doi.org/10.3321/j.issn:1000-6842.2004.z1.021>, 2004.

365 Du, E. Z. and Fang J. Y.: Linking belowground and aboveground phenology in two boreal  
366 forests in Northeast China, *Oecologia*, 176, 883-892, [https://doi.org/10.1007/s00442-014-](https://doi.org/10.1007/s00442-014-3055-y)  
367 3055-y, 2014.

368 Du, Y. J., Xu, H. C., and Yu, R. Y.: The effect of understory, litter and small mammals on  
369 seedling occurrence of *Larix gmelinii*, *Journal of Beijing Forestry University*, 15(4), 12-20,  
370 <https://doi.org/10.13332/j.1000-1522.1993.04.002>, 1993.

371 E, W. F.: Stem respiration spatial-temporal dynamics and characteristics of sapwood/  
372 heartwood of *Larix gmelinii*, Thesis, available at: [http://cdmd.cnki.com.cn/Article/CDMD-](http://cdmd.cnki.com.cn/Article/CDMD-10225-2009133891.htm)  
373 10225-2009133891.htm, last access: 8 October 2017, 2008.

374 E, W. F., Wang C. K., Yang C. P., Wang, X. C., Zhang, Q. Z., and Zhang, Y. Q.: Effects of  
375 provenances on growth characteristics of sapwood and heartwood of *Larix gmelinii* trees,  
376 *Scientia Silvae Sinicae*, 45(6), 109-115, [https://doi.org/10.3321/j.issn:1001-7488.](https://doi.org/10.3321/j.issn:1001-7488.2009.06.019)  
377 2009.06.019, 2009.

378 Feng, L. and Yang, Y. G.: A study on biomass and production of three types of Dahurian larch  
379 virgin forest, *Scientia Silvae Sinicae*, 21(1), 86-92, available at: [http://www.cnki.com.cn/](http://www.cnki.com.cn/Article/CJFDTOTAL-LYKE198501010.htm)  
380 Article/CJFDTOTAL-LYKE198501010.htm, last access: 8 October 2017, 1985.

381 Fu, Y.: Study on *Larix gmelinii* plantation in different planting density in the south of  
382 Daxing'anling City, *Journal of Inner Mongolia Forestry*, 5, 24-26, available at:  
383 <http://www.cnki.com.cn/Article/CJFDTotal-NMLY198405030.htm>, last access: 8 October  
384 2017, 1984.

385 Gao, M. F., Li, C. H., and He, S. S.: Productivity division of *Larix gmelinii* in Great Xing'an  
386 Mountains of Inner Mongolia, *Inner Mongolia Forestry Investigation and Design*, 28,  
387 75-77, 84, <https://doi.org/10.13387/j.cnki.nmld.2005.s1.037>, 2005.

388 Gao, X. W.: Research by the stand density effect on Xing'an larch of natural forest, Thesis,  
389 available at: <http://cdmd.cnki.com.cn/Article/CDMD-10129-1014375561.htm>, last access:  
390 8 October 2017, 2014.

391 Gao, X. W., Zhang, Q. L., Bao, Y., Wang, X. H., Li, D. Y., and Shi, X.: Study on the forest  
392 biomass and carbon density under different cutting patterns of Dahurian Larch forest,  
393 *Forest Resources Management*, 3, 91-96, [https://doi.org/10.13466/j.cnki.lyzygl.2014.03.](https://doi.org/10.13466/j.cnki.lyzygl.2014.03.020)  
394 020, 2014.

395 Gu, Y. C.: The necessity of tending and thinning of natural young and middle aged forest,  
396 *Forest Resources Management*, 1, 58-62, [https://doi.org/10.13466/j.cnki.lyzygl.1985.01.](https://doi.org/10.13466/j.cnki.lyzygl.1985.01.018)  
397 018, 1985a.

398 Gu, Y. C.: The succession of forest communities in the forest region of the Greater Xingan  
399 Mountains, *Acta Phytocologica et Geobotanica Sinica*, 9(1), 64-70, available at:  
400 <http://www.cnki.com.cn/Article/CJFDTOTAL-ZWSB198501006.htm>, last access: 8

401       October 2017, 1985b

402       Guan, J. Q., Cai, T. J., and Man, X. L.: Characteristics of snowpack chemistry in different  
403       type plantations of Xiaoxing'an Mountains, northeastern China, Journal of Beijing Forestry  
404       University, 35(4), 41-46, <https://doi.org/10.13332/j.1000-1522.2013.04.020>, 2013.

405       Guo, R. Y., Fu, Y., Gao, S. C., and Jia, Z. S.: Studies on the reasonable planting density of  
406       Poplar and larch in Xing-an League, Inner Mongolia Forestry Science and Technology, 2,  
407       20-22, 35, available at: [http://www.cnki.com.cn/Article/CJFDTOTAL-NMLK198402005.](http://www.cnki.com.cn/Article/CJFDTOTAL-NMLK198402005.htm)  
408       htm, last access: 8 October 2017, 1984.

409       Guo, Y. X.: The variation characteristics of heartwood and sapwood of artificial *Larix*  
410       *gmelinii*, Thesis, available at: [http://cdmd.cnki.com.cn/Article/CDMD-10225-1015665595.](http://cdmd.cnki.com.cn/Article/CDMD-10225-1015665595.htm)  
411       htm, last access: 8 October 2017, 2015.

412       Guo, Y. X. and Jiang, L. C.: Variation of heartwood and sapwood and growth characteristics  
413       of artificial Dahurian Larch, Journal of Northeast Forestry University, 43(6), 93-97,  
414       <https://doi.org/10.13759/j.cnki.dlxb.20150522.048>, 2015.

415       Han, J. Y., Zhang, H. G., Jia, Q. B., Zhang, Z., and Xu, Y. L.: Genetic variations in growth  
416       traits of juvenile stage hybrid larch in southern Xiao Xing'an Mountains and selection of  
417       superior families, Journal of Northwest Forestry University, 27(6), 78-82,  
418       <https://doi.org/10.3969/j.issn.1001-7461.2012.06.16>, 2012a.

419       Han, M. Z.: A research on biomass and production of *Larix Dahurica* forest communities,  
420       Acta Agriculturae Boreali-Sinica, 2(4), 134-138, [https://doi.org/10.3321/j.issn:1000-7091.](https://doi.org/10.3321/j.issn:1000-7091.1987.04.022)  
421       1987.04.022, 1987.

422       Han, S. L., Zhang, Q. L., AN, H. J., and Yu, B.: Spatial structure characteristics of *Larix*  
423       *gmelinii* natural forest, Journal of Arid Land Resources and Environment, 29(5), 87-92,  
424       <https://doi.org/10.13448/j.cnki.jalre.2015.157>, 2015a.

425       Han, X. C.: Effect on process of burned areas *Larix gmelinii* plantations restoration in  
426       Daxinganling, Thesis, available at: [http://cdmd.cnki.com.cn/Article/CDMD-10225-](http://cdmd.cnki.com.cn/Article/CDMD-10225-1013371072.htm)  
427       1013371072.htm, last access: 8 October 2017, 2013.

428       Han, X. C., Zhao, Y. S., Xin, Y., and et al.: Soil hydrology characteristics of *Larix gmelinii*  
429       plantation in burned forestland in the north of Greater Xing'an Mountains, Journal of Soil  
430       and Water Conservation, 26(4), 183-188, [https://doi.org/10.13870/j.cnki.stbcxb.2012.04.](https://doi.org/10.13870/j.cnki.stbcxb.2012.04.053)  
431       053, 2012b.

432       Han, X. C., Zhao, Y. S., and Xin, Y.: Succession process of *Larix gmelinii* forest with  
433       artificial restoration after fire in Daxing'anling, Science of Soil and Water Conservation,  
434       13(2), 70-76, <https://doi.org/10.16843/j.sswc.2015.02.012>, 2015b.

435       He, H. Y.: Analysis on growth of three species of artificial plantation in Zhangguangcai  
436       Mountains-subregion of Xiaoxingan Mountains, Journal of Northeast Forestry University,  
437       16(1), 32-36, <https://doi.org/10.13759/j.cnki.dlxb.1988.01.005>, 1988.

438       Hong, Q. L., Cai, Y. X., Wang, Y. H., Zhao, H. X., Hu, C. X., Li, F. R., and Fan, W. Y.: The  
439       growth of natural forests of *Larix gmelinii* in Tahe Forestry Bureau Daxingan Mountain  
440       District, Journal of Northeast Forestry University, 22(2), 92-97,  
441       <https://doi.org/10.13759/j.cnki.dlxb.1994.02.017>, 1994.

442       Hu, H. Q., Wei, S. J., and Sun, L.: Estimation of carbon emissions from forest fires in 2010 in  
443       Huzhong of Daxing'anling Mountain, Scientia Silvae Sinicae, 48(10), 109-119,  
444       <https://doi.org/10.11707/j.1001-7488.20121017>, 2012.

445 Huang, C., Meng, F. L., Shan, C. C., and Hua, S.: Techniques for fast growing and high yield  
446 of larch, Journal of Heilongjiang Vocational Institute of Ecological Engineering, 24(1),  
447 28-29, available at: <http://www.cnki.com.cn/Article/CJFDTOTAL-HSGX201101014.htm>,  
448 last access: 8 October 2017, 2011a.

449 Huang, D. Q.: Biomass and carbon storage estimation of *Larix gmelinii*, Thesis, available at:  
450 <http://d.wanfangdata.com.cn/Thesis/Y2026419>, last access: 8 October 2017, 2011.

451 Huang, D. Q., Hu, H. Q., Wang, Z. W., and Sun, L.: Dynamic changes in biomass and  
452 productivity of *Larix gmelinii* plantation after fire, Journal of Northeast Forestry University,  
453 39(9), 62-64, <https://doi.org/10.13759/j.cnki.dlxb.2011.09.025>, 2011b.

454 Huang, S. Z.: The internal cycling of nutrients in fine roots of *Fraxinus Mandshurica* and  
455 *Larix gmelinii*, Thesis, available at: [http://cdmd.cnki.com.cn/Article/CDMD-10225-](http://cdmd.cnki.com.cn/Article/CDMD-10225-2006110390.htm)  
456 [2006110390.htm](http://cdmd.cnki.com.cn/Article/CDMD-10225-2006110390.htm), last access: 8 October 2017, 2006.

457 Huo, H.: The effects of climate warming on photosynthesis and growth of *Larix gmelinii*.  
458 Thesis, available at: <http://cdmd.cnki.com.cn/Article/CDMD-10225-2007187763.htm>, last  
459 access: 8 October 2017, 2007.

460 Jia, S. X., Zhao, Y. L., Sun, Y., Chen, L., and Wang, Z. Q.: Effects of nitrogen fertilization on  
461 seasonal dynamics of soil microbial biomass carbon and nitrogen in *Larix gmelinii* and  
462 *Fraxinus mandshurica* plantations, Chinese Journal of Applied Ecology, 20(9), 2063-2071,  
463 <https://doi.org/10.13287/j.1001-9332.2009.0380>, 2009.

464 Jiang, H. Y.: Study on hydrological characteristics of forest ecosystem in Daxing'anling,  
465 Thesis, available at: <http://cdmd.cnki.com.cn/Article/CDMD-10225-2009132313.htm>, last  
466 access: 8 October 2017, 2008.

467 Jiang, H. Y., Zhao, Y. S., Chen, X. W., Li, W. H., Zhu, W. C., Lv, W. B., and Li, X. P.:  
468 Research on soil hydrology characteristics of some main forest type in south part of  
469 Daxing'anling, Journal of Soil and Water Conservation, 21(3), 149-153,187,  
470 <https://doi.org/10.13870/j.cnki.stbcb.2007.03.033>, 2007.

471 Jiang, H. Y., Zhao, Y. S., Xin, X. J., Ma, W. H., Li, X. P., Sun, C. K., Guo, X. W.:  
472 Precipitation distribution laws of different forest stand in Daxing'Anling, Journal of Soil  
473 and Water Conservation, 22(6), 197-201, [https://doi.org/10.13870/j.cnki.stbcb.2008.](https://doi.org/10.13870/j.cnki.stbcb.2008.06.044)  
474 [06.044](https://doi.org/10.13870/j.cnki.stbcb.2008.06.044), 2008.

475 Jiang, L. F.: Study on mechanism of photosynthesis and respiration of *Larix gmelinii*  
476 plantations, Thesis, available at: [http://cdmd.cnki.com.cn/Article/CDMD-10225-](http://cdmd.cnki.com.cn/Article/CDMD-10225-2003110988.htm)  
477 [2003110988.htm](http://cdmd.cnki.com.cn/Article/CDMD-10225-2003110988.htm), last access: 8 October 2017, 2003.

478 Jiang, L. F., Shi, F. C., Li, B., Luo, Y. Q., Chen, J. Q., and Chen, J. K.: Separating rhizosphere  
479 respiration from total soil respiration in two larch plantations in northeastern China, Tree  
480 Physiology, 25, 1187-1195, <https://doi.org/10.1093/treephys/25.9.1187>, 2005.

481 Jiang, L. F., Shi, F. C., Zu, Y. G., Wang, W. J., and Koike, T.: Study on stem respiration of  
482 *Larix gmelinii* of different ages and its relationship to environmental factors, Bulletin of  
483 Botanical Research, 23(3), 296-301, <https://doi.org/10.3969/j.issn.1673-5102.2003.03.012>,  
484 2003.

485 Jiang, R., Sun, L., and Hu, H. Q.: The seasonal dynamics of soil microbial biomass of  
486 a *Larix gmelinii* forest after wildfire, African Journal of Microbiology Research, 6(10),  
487 2328-2336, <https://doi.org/10.5897/ajmr11.1264>, 2012.

488 Laboratory of Forest Tree and Breeding, Northeast Forestry University(LFTB):. Study on

489 larch heterosis, *Forestry Science & Technology*, 1, 1-3, [https://doi.org/10.13456/j.cnki.lykt.](https://doi.org/10.13456/j.cnki.lykt.1979.01.001)  
490 1979.01.001, 1979.

491 Li, B.: The impact of different densities on the *Larix gmelinii* plantation. Thesis, available at:  
492 <http://cdmd.cnki.com.cn/Article/CDMD-10129-1013248427.htm>, last access: 8 October  
493 2017, 2013a.

494 Li, B., De, Y. J., Wei, Q., Wang, Y., Wang, Y. B., and Bao, Y. Q.: Effects of three densities on  
495 the growth of *Larix gmelinii* plantations, *Journal of Inner Mongolia Agricultural University*,  
496 34(2), 65-68, <https://doi.org/10.16853/j.cnki.1009-3575.2013.02.013>, 2013.

497 Li, J., Luo, Y. Q., Shi, J., Zhou, J., Wang, X. L., Ma L. Y., and Chen C.: Use of  
498 phyto-attractant in monitoring and controlling gypsy moth, *Journal of Beijing Forestry*  
499 *University*, 33(4), 85-90, <https://doi.org/10.13332/j.1000-1522.2011.04.010>, 2011.

500 Li, L. N., Zhao, L., Zhang, W. J., and Wang, X. J.: Study on species diversity in different  
501 density of *Larix gmelinii* plantations in Zhalantun Region, *Practical Forestry Technology*, 8,  
502 9-11, <https://doi.org/10.13456/j.cnki.lykt.2014.08.002>, 2014.

503 Li, M., Gu, J. C., Zhang, Z. W., and Wang, Z. Q.: Responses of fine root mass, length,  
504 production and turnover to soil nitrogen fertilization in *Larix gmelinii* and *Fraxinus*  
505 *mandshurica* forests in Northeastern China, *Journal of Forest Research*, 15, 194-201,  
506 <https://doi.org/10.1007/s10310-009-0176-y>, 2010a.

507 Li, Q., Chen, J., Li, T., and Liu, F. J.: Ecological function of artificial coniferous timber  
508 forests in water conservation, *Jilin Forestry Science and Technology*, 36(3), 14-17, 20,  
509 <https://doi.org/10.16115/j.cnki.issn.1005-7129.2007.03.004>, 2007.

510 Li, S. L. and Chen, Y. L.: Decomposition and nutrient return of the leaf litter under the pure  
511 and mixed plantations of *Juglans mandshurica* and *Larix gmelinii*, *Journal of Nanjing*  
512 *Forestry University: Natural Science Edition*, 28(5), 59-62,  
513 <https://doi.org/10.3969/j.issn.1000-2006.2004.05.014>, 2004.

514 Li, X. F.: Comprehensive evaluation of the effects of different thinning intensities on *Larix*  
515 *gmelinii* forest in Great Xing'an Mountains of Inner Mongolia, *Inner Mongolia Forestry*  
516 *Investigation and Design*, 1, 7-20, available at: [http://www.cqvip.com/QK/90816X/](http://www.cqvip.com/QK/90816X/199301/1276513.html)  
517 199301/1276513.html, last access: 8 October 2017, 1993.

518 Li, X. F.: Study on genetic diversity of provenances and clones of *Larix gmelinii* (Rupr.) Rupr,  
519 Thesis, available at: <http://cdmd.cnki.com.cn/Article/CDMD-10225-2009134088.htm>, last  
520 access: 8 October 2017, 2009.

521 Li, X. F.: Spatio-temporal dynamics and influencing factors of fine roots in five Chinese  
522 temperate forest ecosystems, Thesis, available at: [http://cdmd.cnki.com.cn/Article/CDMD-](http://cdmd.cnki.com.cn/Article/CDMD-10225-1013366884.htm)  
523 10225-1013366884.htm, last access: 8 October 2017, 2013b.

524 Li, X. Y.: The study on dynamic features of several metabolites of larch(*Larix gmelinii*),  
525 Thesis, available at: <http://cdmd.cnki.com.cn/Article/CDMD-10225-2005136726.htm>, last  
526 access: 8 October 2017, 2005.

527 Li, Y. W., Chen, X. H., and Hu, M. Q.: Study on growth and mortality of mature and  
528 over-mature *Larix gmelinii* forest in Daxinganling forest region, *Forest Resources*  
529 *Management*, 1, 38-43, <https://doi.org/10.13466/j.cnki.lyzygl.1979.01.007>, 1979.

530 Li, Z. F., Zhao, Y. S., Xin, Y., Kong, X. F., and Wu, C. Y.: Soil water storage and infiltration  
531 characteristics under 3 artificial forests in the upper reaches of Ashihe river, *Science of Soil*  
532 *and Water Conservation*, 8(1), 77- 80, <https://doi.org/10.16843/j.sswc.2010.01.014>, 2010b.

533 Li, Z. F., Zhao, Y. S., Xin, Y., Kong, X. F., and Wu, C. Y.: Temporal and spatial variation of  
534 soil water under different forest types in the upper reaches of Ashihe River, *Science of Soil  
535 and Water Conservation*, 8(4), 86-89, <https://doi.org/10.16843/j.sswc.2010.04.016>, 2010c.

536 Lin, L.: Afforestation techniques on southward slopes in Greater Khingan Mts. forest district,  
537 *Journal of Northeast Forestry University*, 3, 48-58, available at: [http://www.cnki.com.cn/  
538 Article/CJFDTOTAL-DBLY198103005.htm](http://www.cnki.com.cn/Article/CJFDTOTAL-DBLY198103005.htm), last access: 8 October 2017, 1981.

539 Liu, G. L.: Intermediate cutting experiment of larch (*Larix* sp.) plantation, *Journal of  
540 North-Eastern Forestry Institute*, 12(1), 33-46, [https://doi.org/10.13759/j.cnki.dlxb.  
541 1984.01.004](https://doi.org/10.13759/j.cnki.dlxb.1984.01.004), 1984.

542 Liu, G. L. and Xu, M. H.: Study on half-sib breeding plantation of different larches. *Forestry  
543 Science and Technology*, 2: 19-24. available at: [http://www.cnki.com.cn/Article/  
544 CJFDTOTAL-JLLK198402003.htm](http://www.cnki.com.cn/Article/CJFDTOTAL-JLLK198402003.htm), last access: 8 October 2017, 1984.

545 Liu, H. L., Cai, T. J., Man, X. L., Chai, R. S., and Lang, Y.: Effects of major forest types of  
546 Xiaoxing'an Mountains on the process of snowfall, snow cover and snow melting, *Journal  
547 of Beijing Forestry University*, 34(2), 20-25, [https://doi.org/10.13332/j.1000-1522.  
548 2012.02.003](https://doi.org/10.13332/j.1000-1522.2012.02.003), 2012.

549 Liu, J. L., Wang, C. K., and Zhang, Q. Z.: Spatial variations in stem heartwood and sapwood  
550 for *Larix gmelinii* trees with various differentiation classes, *Scientia Silvae Sinicae*, 50(12),  
551 114-121, <https://doi.org/10.11707/j.1001-7488.20141216>, 2014.

552 Liu, S. R., Chai, Y. X., Cai, T. J., and Peng, C. H.: Study on biomass and net primary  
553 productivity of Dahurian larch plantation, *Journal of Northeast Forestry University*, 18(2),  
554 40-46, <https://doi.org/10.13759/j.cnki.dlxb.1990.02.006>, 1990a.

555 Liu, S. R., Li, X. M., and Niu, L. M.: The degradation of soil fertility in pure larch plantations  
556 in the northeastern part of China, *Ecological Engineering*, 10, 75-86,  
557 [https://doi.org/10.1016/s0925-8574\(97\)10024-6](https://doi.org/10.1016/s0925-8574(97)10024-6), 1998.

558 Liu, T. Y.: Carbon storage in Manchurian ash and Dahurian larch plantations with different  
559 stand structures. Thesis, available at: [http://cdmd.cnki.com.cn/Article/CDMD-  
560 10225-1012445805.htm](http://cdmd.cnki.com.cn/Article/CDMD-10225-1012445805.htm), last access: 8 October 2017, 2012.

561 Liu, W. and Deng, H.: Study on the effect of different afforestation methods on the survival  
562 rate of *Larix*, *Forestry Science and Technology Information*, 39(4), 4-5,  
563 <https://doi.org/10.3969/j.issn.1009-3303.2007.04.003>, 2007.

564 Liu, X. T., Du, X. G., Liang, L., Zhang, P., Zhang, B. C., and Zhang, Y. S.: The selection of  
565 geographic provenances of *Larix gmelinii* in the eastern slope of Great Xing'an Mountain,  
566 *Journal of Northeast Forestry University*, 18, 9-16, [https://doi.org/10.13759/j.cnki.dlxb.  
567 1990.s2.003](https://doi.org/10.13759/j.cnki.dlxb.1990.s2.003), 1990b.

568 Liu, X. T., Zhang, H. J., Wang, S. X., Lin, Y. K., and He, X. Y.: Introduction of *Larix olgensis*  
569 in Daxing'anling, *Journal of Northeast Forestry University*, 17(3), 18-25, available at:  
570 <http://www.cnki.com.cn/Article/CJFDTOTAL-DBLY198903002.htm>, last access: 8  
571 October 2017, 1989.

572 Liu, Y.: Study on the niche and the production of artificial Korean pine and Larch population.  
573 Thesis, available at: <http://cdmd.cnki.com.cn/Article/CDMD-10225-2003111030.htm>, last  
574 access: 8 October 2017, 2002.

575 Liu, Y. C., Wu, M. C., Chu, Y. J., Liu, D. C., and He, Z. J.: Study on the provenance test of  
576 *Larix gmelinii*. *Forestry Science and Experiment*, 35, 1-17, available at: <http://www.cqvip>.

577 com/QK/92313X/199035/319899.html, last access: 8 October 2017, 1990c.

578 Lu, X., Hu, H. Q., Sun, L., and Wei, S. J.: Effects of fire disturbance on soil light fraction  
579 organic carbon of *Larix gmelinii* forest, Journal of Anhui Agricultural Sciences, 41(29),  
580 11709-11713, <https://doi.org/10.13989/j.cnki.0517-6611.2013.29.006>, 2013.

581 Luo, Y. J., Wang, X. K., Zhang, X. Q., and Lu, F.: Biomass and its allocation of forest  
582 ecosystems in China, China Forestry Publishing House, Beijing, China, 2013.

583 Ma, H. B.: Stem sap flow dynamics in relation to environmental factors of *Larix gmelinii*.  
584 Thesis, <https://doi.org/10.7666/d.y1473827>, 2009.

585 Ma, J. W.: Study on spectral characteristics of pure stands under different site conditions and  
586 phenological stages at Maoershan Area, Journal of Beijing Forestry College, 3, 26-40,  
587 <https://doi.org/10.13332/j.1000-1522.1983.03.003>, 1983.

588 Ma, J. W., Zhang, H. G., Liu, L., Zhang, Z., and Jia, Q. B.: Genetic variation of hybrid larch  
589 at juvenile period and its superior family selection, Journal of Northeast Forestry  
590 University, 40(9), 1-5, <https://doi.org/10.13759/j.cnki.dlxb.2012.09.019>, 2012.

591 Mao, W. X., Tong, D. H., Zhang, C., Zhao, D. D., Ding, Y. Y., and Jin, S.: Spatial  
592 heterogeneity of moisture content of land surface dead fuel in larch stand and effects of  
593 sampling methods on moisture estimation, Journal of Northeast Forestry University, 40(5),  
594 29-33, <https://doi.org/10.13759/j.cnki.dlxb.2012.05.012>, 2012.

595 Mao, Y. Q., Zhang, J. L., Wang, F. S., Liu, L., Zhao, W., Zhang, H. P., Yuan, L. D., Wang, F. J.,  
596 and Li, B. C.: Study on the provenance test of *Larix olgensis* and *Larix gmelinii*, Protection  
597 Forest Science and Technology, 2, 10-15, [https://doi.org/10.13601/j.issn.1005-5215](https://doi.org/10.13601/j.issn.1005-5215.1993.02.003).  
598 1993.02.003, 1993.

599 Mao, Y. Q., Zhang, J. L., Wang, F. S., Liu, L., and Wu, C. J.: A study on introduction of Larch.  
600 Scientia Silvae Sinicae 34(4): 48-58. available at: [http://www.cnki.com.cn/Article/  
601 CJFDTOTAL-LYKE804.006.htm](http://www.cnki.com.cn/Article/CJFDTOTAL-LYKE804.006.htm), last access: 8 October 2017, 1998.

602 Meng, C., Wang, L. H., Wang, J., You, X. F., Liu, Y. Q., and Xing, J.: Diurnal change in soil  
603 respiration rate in five types of plantations during non-growing season, Journal of  
604 Northeast Forestry University, 37(11), 77-79, 91, [https://doi.org/10.13759/j.cnki.dlxb](https://doi.org/10.13759/j.cnki.dlxb.2009.11.029).  
605 2009.11.029, 2009.

606 Meng, X. Q., Li, H. Y., Wang, Y. M., Zhang, Y. W., and Yang, W. Y.: Study on the effects of  
607 *Coleophora dahurica* on tree growth, Journal of Liaoning Forestry Science & Technology,  
608 5, 19-20, available at: [http://www.cnki.com.cn/Article/CJFDTOTAL-LNLK200005007.  
609 htm](http://www.cnki.com.cn/Article/CJFDTOTAL-LNLK200005007.htm), last access: 8 October 2017, 2000.

610 Mu, T. M. and Yan, W.: Preliminary study on the evapotranspiration in Xingan larch forest,  
611 Journal of Northeast Forestry University, 2, 21-30, available at: [http://www.cnki.com.cn/  
612 Article/CJFDTOTAL-DBLY198202001.htm](http://www.cnki.com.cn/Article/CJFDTOTAL-DBLY198202001.htm), last access: 8 October 2017, 1982.

613 Na, D. C.: A study on genetic diversity of different geographic provenances of *Larix*  
614 *gmelinii*(Rupr.) Rupr and its utilization, Thesis, available at: [http://cdmd.cnki.com.cn/  
615 Article/CDMD-10225-2005136986.htm](http://cdmd.cnki.com.cn/Article/CDMD-10225-2005136986.htm), last access: 8 October 2017, 2005.

616 Na, D. C., Yang, C. P., Jiang, J., Xia, D. A., and Wang, H. R.: Provenance division and  
617 superior provenance choice of *Larix gmelinii*, Forestry Science & Technology, 30(4), 1-4,  
618 <https://doi.org/10.3969/j.issn.1001-9499.2005.04.001>, 2005.

619 Piao, C. B., Zhang, W. X., Lin, J., and Ma, A. B.: The preliminary report on the good natural  
620 Dahurian larch stand transformation for seed stand, Forestry Science & Technology, 16(3),

621 17-23, available at: <http://www.cnki.com.cn/Article/CJFDTOTAL-LYKJ199103005.htm>,  
622 last access: 8 October 2017, 1991.

623 Qi, G., Wang, Q. L., Wang, X. C., Qi, L., Wang, Q. W., Ye, Y. J., and Dai, L. M.: Vegetation  
624 carbon storage in *Larix gmelinii* plantations in Great Xing'an Mountains, Chinese Journal  
625 of Applied Ecology, 22(2), 273-279, <https://doi.org/10.13287/j.1001-9332.2011.0072>, 2011.

626 Qi, G., Wang, Q. L., Wang, X. C., Yu, D. P., Zhou, L., Zhou, W. M., Peng, S. L., and Dai, L.  
627 M.: Soil organic carbon storage in different aged *Larix gmelinii* plantations in Great  
628 Xing'an Mountains of Northeast China, Chinese Journal of Applied Ecology, 24(1), 10-16,  
629 <https://doi.org/10.13287/j.1001-9332.2013.0122>, 2013.

630 Qiu, L.: Temporal dynamic change of soil pool in larch plantations and its contribution to the  
631 forest carbon budget in NE China, Thesis, available at: [http://cdmd.cnki.com.cn/Article/](http://cdmd.cnki.com.cn/Article/CDMD-10225-1011146228.htm)  
632 [CDMD-10225-1011146228.htm](http://cdmd.cnki.com.cn/Article/CDMD-10225-1011146228.htm), last access: 8 October 2017, 2011.

633 Qiu, L., Zu, Y. G., Wang, W. J., Sun, W., Su, D. X., and Zheng, G. Y.: CO<sub>2</sub> flux characteristics  
634 and their influence on the carbon budget of a larch plantation in Maershan region of  
635 Northeast China, Chinese Journal of Applied Ecology, 22(1), 1-8,  
636 <https://doi.org/10.13287/j.1001-9332.2011.0031>, 2011.

637 Quan, X., Wang, C., Zhang, Q., Wang, X., Luo, Y., and Bond-Lamberty, B.: Dynamics of fine  
638 roots in five Chinese temperate forests, Journal of Plant Research, 123, 497-507,  
639 <https://doi.org/10.1007/s10265-010-0322-9>, 2010.

640 Ren, B. P.: Research on growth process and stand density of *Larix gmelinii* plantation,  
641 Journal of Inner Mongolia Radio & TV University, 2, 73-75, 85,  
642 <https://doi.org/10.16162/j.issn.1672-3473.2010.02.022>, 2010.

643 Ren, L. J., Li, G. T., Sun, X. J., Yu, S. P., Zheng, X. W., and Yue, Y. J.: Research on  
644 community structure and species diversity of *Larix gmelinii* community in Inner Mongolia  
645 Daxing'anling Mountains, Forest Resources Management, 3, 83-87, 118,  
646 <https://doi.org/10.13466/j.cnki.lyzygl.2013.03.023>, 2013.

647 Shang, Y. L., Zhang, S. H., Chen, Z. C., and Wang, G. Y.: Fine family selection and genetic  
648 gain of *Larix gmelinii*, Journal of Northeast Forestry University, 38(7), 123-125,  
649 <https://doi.org/10.13759/j.cnki.dlxb.2010.07.017>, 2010.

650 Sheng, H. C., Cai, T. J., Zhu, D. G., and Shi, F. C.: Rainfall redistribution and hydrochemical  
651 characteristics in the Larch plantation, Journal of Soil and Water Conservation, 23(2),  
652 79-83, 89, <https://doi.org/10.13870/j.cnki.stbcbx.2009.02.050>, 2009.

653 Si, H. Z., Yang, S., Li, J., Wang, F. S. and Wen, B. Y.: A study on introduction of *Larix*  
654 *kaempferi*, Forest Science and Technology, 11, 5-7, [https://doi.org/10.13456/j.cnki.lykt.](https://doi.org/10.13456/j.cnki.lykt.1999.11.002)  
655 1999.11.002, 1999.

656 Song, C. L., Zhao, P. W., Su, R. N., Hai, L., Zhou, M., and Feng, L.: Dynamic study of  
657 photosynthetic characteristics of *Larix gmelinii*, Journal of Inner Mongolia Agricultural  
658 University, 29(4), 49-54, available at: [http://www.cnki.com.cn/Article/CJFDTOTAL-](http://www.cnki.com.cn/Article/CJFDTOTAL-NMGM200804010.htm)  
659 [NMGM200804010.htm](http://www.cnki.com.cn/Article/CJFDTOTAL-NMGM200804010.htm), last access: 8 October 2017, 2008a.

660 Song, S., Gu, J. C., Quan, X. K., Guo, D. L. and Wang, Z. Q.: Fine-root decomposition of  
661 *Fraxinus mandshurica* and *Larix gmelinii* plantations, Journal of Plant Ecology, 32(6),  
662 1227-1237, <https://doi.org/10.3773/j.issn.1005-264x.2008.06.003>, 2008b.

663 Song, W. Y.: Carbon density and its distribution of *Pinus koraiensis* and *Larix gmelinii*  
664 plantations in different regions of Heilongjiang province. Thesis, available at:

665 <http://cdmd.cnki.com.cn/Article/CDMD-10225-1014402349.htm>, last access: 8 October  
666 2017, 2013.

667 Song, X. S., Bao, F. L., and Zhang, Y. L.: The analysis of the economic benefit on the fast  
668 growing and high yield of *Larix gmelini* plantation, *Forestry Science & Technology*, 17(2),  
669 16-17, available at: <http://www.cnki.com.cn/Article/CJFDTOTAL-LYKJ199202004.htm>,  
670 last access: 8 October 2017, 1992.

671 Song, X. S., Guo, S. Y., and Wang, J. X.: Study on fast growing and high yield of *Larix*  
672 *gmelini* plantation, *Forestry Science & Technology*, 21(3), 22-24, available at:  
673 <http://www.cnki.com.cn/Article/CJFDTOTAL-LYKJ603.009.htm>, last access: 8 October  
674 2017, 1996.

675 Sun, C. Z., Shen, G. F., Li, J. Y., and Jia, L. M.: Study on the present condition and the  
676 potentialities of the productivity of main tree species plantation of china II. study on the  
677 plantation productivities of Eucalyptus, Larix and Pinus sylvestris var. Mongolica, *Forest*  
678 *Research*, 14(6), 657-667, <https://doi.org/10.13275/j.cnki.lykxyj.2001.06.012>, 2001.

679 Sun, H. Z., Chen, M. Y., Cai, C. J., and Zhu, N.: Effects of different type urban forest  
680 plantations on soil fertility, *Chinese Journal of Applied Ecology*, 20(12), 2871-2876,  
681 <https://doi.org/10.13287/j.1001-9332.2009.0454>, 2009.

682 Sun, H. Z., Lu, X. J., Chen, M. Y., Cai, C. J., and Zhu, N.: Soil heavy metals concentration in  
683 different type plantations in Harbin City, *Chinese Journal of Applied Ecology*, 22(3),  
684 614-620, <https://doi.org/10.13287/j.1001-9332.2011.0126>, 2011.

685 Sun, X. M., Zhang, S. G., Zhou, D. Y., Wang, X. D., Ding, B. and Liu, S. M.: Phenological  
686 variation of Larix species and their intra-species and inter-species hybrid families and early  
687 selection, *Scientia Silvae Sinicae*, 44(1), 77-84, [https://doi.org/10.3321/j.issn:1001-7488](https://doi.org/10.3321/j.issn:1001-7488.2008.01.013).  
688 2008.01.013, 2008.

689 Sun, Y.: Effects of soil fauna on root biomass, morphology, production and turnover rate in  
690 Larch and Ash plantations, Thesis, available at: [http://cdmd.cnki.com.cn/Article/CDMD-](http://cdmd.cnki.com.cn/Article/CDMD-10225-2010242477.htm)  
691 [10225-2010242477.htm](http://cdmd.cnki.com.cn/Article/CDMD-10225-2010242477.htm), last access: 8 October 2017, 2010.

692 Sun, Y., Wang, L. L., Chen, J., and Duan J. P.: Reconstructing mean maximum temperatures  
693 of May–August from tree-ring maximum density in North Da Hinggan Mountains, China,  
694 *Chinese Science Bulletin*, 57(16), 2007-2014, <https://doi.org/10.1007/s11434-012-5055-9>,  
695 2012.

696 Sun, Z. B. and Sun, X. W.: Selection of species and seed sources for Larix spp. in Chifeng  
697 Region, Inner Mongolia, in: Ma, C.G., ed. Selection of optimum species and seed sources  
698 for plantations of larch, Beijing Agricultural University Press, Beijing, China, 1992.

699 Sun, Z. B., Wang, X.W., Ding, M.X., Shi, J.S., Liu, Z., and Bao, G.Z.: Study on selection of  
700 optimum species and seed sources for plantations of larch, *Forest Science and Technology*,  
701 10, 11-13, <https://doi.org/10.13456/j.cnki.lykt.1991.10.005>, 1991.

702 Tang, J. Z., Li, Q. Y., Wang, H. X., and Wang, Y. G.: The main raw material forest of larch  
703 growth indicators, *Forest Investigation Design*, 3, 61-63, available at:  
704 <http://www.cnki.com.cn/Article/CJFDTOTAL-LYKC200903029.htm>, last access: 8  
705 October 2017, 2009.

706 Tian, F., Bi, X. H., Shen, G. T., Zhou, B. and Li, W. B.: Study on the forecast technique and  
707 control index of larch caterpillar of a cycle in two years, *Forest Research*, 11(4), 388-395,  
708 <https://doi.org/10.13275/j.cnki.lykxyj.1998.04.008>, 1998.



- 709 Wang, B. S.: The undergrowth succession in larch plantations before and after cutting,  
710 Journal of Northeast Forestry University, 24(5), 82-86, [https://doi.org/10.13759/  
711 j.cnki.dlxb.1996.05.014](https://doi.org/10.13759/j.cnki.dlxb.1996.05.014), 1996.
- 712 Wang, C. K.: Biomass allometric equations for 10 co-occurring tree species in Chinese  
713 temperate forests, Forest Ecology and Management, 222, 9-16,  
714 <https://doi.org/10.1016/j.foreco.2005.10.074>, 2006.
- 715 Wang, C. K., Gower, S. T., Wang, Y. H., Zhao, H. X., Yan, P., and Bond-Lamberty, B.: The  
716 influence of fire on carbon distribution and net primary production of boreal *Larix gmelinii*  
717 forests in north-eastern China, Global Change Biology, 7, 719-730,  
718 <https://doi.org/10.1046/j.1354-1013.2001.00441.x>, 2001a.
- 719 Wang, C. K. and Yang, J. Y.: Rhizospheric and heterotrophic components of soil respiration  
720 in six Chinese temperate forests, Global Change Biology, 13, 123-131,  
721 <https://doi.org/10.1111/j.1365-2486.2006.01291.x>, 2007.
- 722 Wang, H. X., Zhang, S. H., Jing, C. Q., Dai, J. G., Liu, Y. T. and Zhou, J. Y.: Cultivation  
723 techniques for raw material forest of short rotation Larch, Forestry Science & Technology,  
724 25(5), 7-8, <https://doi.org/10.3969/j.issn.1001-9499.2000.05.003>, 2000a.
- 725 Wang, J. Z.: Study on selection of larch species, Jilin Forestry Science and Technology, 1,  
726 22-26, available at: <http://www.cqvip.com/QK/96402X/199501/1795612.html>, last access:  
727 8 October 2017, 1995.
- 728 Wang, L.: Regeneration rules of the north forest region in western slope of Inner Mongolia  
729 Daxing'anling, Inner Mongolia Forestry Investation and Design, S1, 65-69,  
730 <https://doi.org/10.13387/j.cnki.nmld.2000.s1.022>, 2000.
- 731 Wang, L., Li, C. H., Yang, J. Y., and Guo, Y. L.: Biomass changes of artificial *Larix gmelinii*  
732 from 2002 to 2012 in Helong, Jilin Province, Journal of Green Science and Technology, 2,  
733 11-12, <https://doi.org/10.3969/j.issn.1674-9944.2013.02.005>, 2013a.
- 734 Wang, L. H., Xin, Y., Zou, M. L., Zhao, Y. S., Lei, Y. Y., and Chen, L.: Litter water-holding  
735 characteristics in the process of vegetation restoration in severely burned area of Great  
736 Xing'an Mountains, Journal of Soil and Water Conservation, 28(6), 262-267,  
737 <https://doi.org/10.13870/j.cnki.stbcxb.2014.06.048>, 2014.
- 738 Wang, L. H., Xin, Y., Zou, M. L., Zhao, Y. S., Liu, S. J., and Ren, Q. S.: Plants diversity and  
739 biomass distribution of vegetation restoration in burned area of Great Xing'an Mountains,  
740 Journal of Beijing Forestry University, 37(12), 41-47, [https://doi.org/10.13332/j.1000-1522.  
741 20150025](https://doi.org/10.13332/j.1000-1522.20150025), 2015a.
- 742 Wang, Q. B., Zhang, H. J., Zhang, S. L., Wang, C. B., and Xue, Y.: Species composition and  
743 structure investigation of typical plant community in Daliangzihe National Forest Park,  
744 Protection Forest Science and Technology, 7, 14-17, 38, [https://doi.org/10.13601/  
745 j.issn.1005-5215.2015.07.006](https://doi.org/10.13601/j.issn.1005-5215.2015.07.006), 2015b.
- 746 Wang, Q. J., Liu, Y. T., Dai, J. G., and Luo, Y. F.: Effects of different provenances and ABT1  
747 rooting powder on *Larix gmelinii* afforestation, Forestry Science & Technology, 25(4), 4-5,  
748 <https://doi.org/10.3969/j.issn.1001-9499.2000.04.002>, 2000b.
- 749 Wang, Q. Y.: Genetic variation of the provenance for *Picea koraiensis*, Thesis, available at:  
750 <http://cdmd.cnki.com.cn/Article/CDMD-10225-2003110985.htm>, last access: 8 October  
751 2017, 2003.
- 752 Wang, W. Z., Chen, J., Zhang, B. Y., Feng, Y. L. and Wang, Y. T.: Study on the photosynthetic

753 characteristics and the primary productivity of *Larix olgensis*, Journal of Northeast  
754 Forestry University, 22(4), 15-21, <https://doi.org/10.13759/j.cnki.dlxb.1994.04.003>, 1994.

755 Wang, X. F., Li, G. T., Wu, H. B., Lv, L. K., and Yue, Y. J.: Research on structure and species  
756 diversity of *Larix gmelinii* community in Orqohan, Journal of Southwest Forestry  
757 University, 33(5), 69-73, <https://doi.org/10.3969/j.issn.2095-1914.2013.05.012>, 2013b.

758 Wang, X. H., Zhang, Q. L., Guo, Y. D., Xing, T. T., Wang, F., Gao, X. W., and Wu, J.: Study  
759 on the coarse root biomass and distribution characteristics about natural *Larix gmelinii*  
760 forest. Forest Resources Management, 5, 62-66, [https://doi.org/10.13466/j.cnki.lyzygl.](https://doi.org/10.13466/j.cnki.lyzygl.2013.05.020)  
761 2013.05.020, 2013c.

762 Wang, X. W. and Mao, Z. J.: Temporal and spatial variation in gas exchange in canopy of  
763 *Larix gmelinii* plantation, Scientia Silvae Sinicae, 43(11), 43-49,  
764 <https://doi.org/10.3321/j.issn:1001-7488.2007.11.008>, 2007.

765 Wang, X. W. and Mao, Z. J.: Practicability of 7 light responsive curve models to different  
766 plant species, Bulletin of Botanical Research, 29(1), 43-48, available at:  
767 <http://www.cnki.com.cn/Article/CJFDTOTAL-MBZW200901012.htm>, last access: 8  
768 October 2017, 2009.

769 Wang, Y. H., Zhou, G. S., and Jiang, Y. L.: Simulation of NPP and evaluation of ecosystem  
770 services of *Larix gmelinii* forest, Chinese Journal of Applied Ecology, 12(5), 648-652,  
771 <https://doi.org/10.13287/j.1001-9332.2001.0157>, 2001a.

772 Wang, Y. L.: Biomass, carbon density and distribution characteristics in different age *Larix*  
773 *gmelinii* plantations, Journal of Anhui Agricultural Sciences, 43(15), 144-145,150,  
774 <https://doi.org/10.13989/j.cnki.0517-6611.2015.15.053>, 2015.

775 Wang, Z.: Larch Forest in China, China Forestry Publishing House, Beijing, China, 73-150,  
776 1992.

777 Wu, C. Y, Zhao, Y. S., Xin, Y., Kong, X. F. and Li, Z. F.: Effects of structure of the *Larix*  
778 *gmelinii* plantation on soil hydrology characteristic, Science of Soil and Water  
779 Conservation, 7(5), 58-62, <https://doi.org/10.16843/j.sswc.2009.05.011>, 2009.

780 Wu, X. J., Cai, T. J., Li, H., and Sheng, H. C.: Precipitation hydrochemical characteristic in  
781 virgin *Pinus koraiensis* forest and artificial *Larix gmelinii* forest in Liangshui National  
782 Nature Reserve, Science of Soil and Water Conservation, 6(6), 37-42,  
783 <https://doi.org/10.16843/j.sswc.2008.06.007>, 2008.

784 Wu, X. J., Jia, E. L., and Li, J. C.: Preliminary study on the regeneration before clear cutting  
785 in *Larix gmelinii* plantation, Forest Science and Technology, 8, 24-26,  
786 <https://doi.org/10.13456/j.cnki.lykt.1983.08.010>, 1983.

787 Wu, X. L.: Interannual variability of temperature, precipitation and sunshine hours in  
788 Wuerqihan Forest Region, Heilongjiang Agricultural Sciences, 10, 113-116,  
789 <https://doi.org/10.11942/j.issn1002-2767.2015.10.0113>, 2015.

790 Wu, Z. C.: Introduction and afforestation of *Larix olgensis*, Journal of Inner Mongolia  
791 Forestry, 12, 20-21, available at: [http://www.cnki.com.cn/Article/CJFDTOTAL-](http://www.cnki.com.cn/Article/CJFDTOTAL-NMLY198612016.htm)  
792 NMLY198612016.htm, last access: 8 October 2017, 1986.

793 Xia, C. C., Liu, Z. L., Wang, Q. C., and Li, K. L.: Comparison of the growth and biomass  
794 production of monoculture and mixed stands of *Larix gmelinii* and *Betula platyphylla*,  
795 Journal of Northeast Forestry University, 40(10), 1-3,  
796 <https://doi.org/10.13759/j.cnki.dlxb.2012.10.021>, 2012.

797 Xiao, S. L. and Yang, J. L.: Individual tree aboveground biomass of *Larix gmelinii* natural  
798 forest in the Northern Greater Khingan Mountains, *Scientia Silvae Sinicae*, 50(8), 22-29,  
799 <https://doi.org/10.11707/j.1001-7488.20140804>, 2014.

800 Xiao, Y., Man, X. L., and Fan, J. F.: Soil fertility and water conservation function of main  
801 forest types in Gongbiela River Watershed, *Journal of Northeast Forestry University*, 34(1),  
802 28-30, <https://doi.org/10.13759/j.cnki.dlxb.2006.01.010>, 2006.

803 Xin, Y., Zhao, Y. S., and Pan, B. Y.: Influence of *Larix gmelinii* plantations at Eastern  
804 Mountainous Region in Heilongjiang Province on water quality, *Science of Soil and Water  
805 Conservation*, 4(2), 29-33, <https://doi.org/10.16843/j.sswc.2006.02.006>, 2006.

806 Xin, Y., Zou, M. L., and Zhao, Y.S.: Soil water storage capacity and infiltration properties of  
807 *Larix gmelinii* plantation in different growth age after burned in Greater Khingan  
808 Mountains, *Chinese Journal of Soil Science*, 45(4), 823-829,  
809 <https://doi.org/10.19336/j.cnki.trtb.2014.04.009>, 2014.

810 Xu, H. C. and Du, Y. J.: Amount of falling seed and seedling occurrence dynamics in  
811 primitive *Larix gmelinii* forest, *Scientia Silvae Sinicae*, 29(4), 298-306, available at:  
812 <http://www.cnki.com.cn/Article/CJFDTOTAL-LYKE199304001.htm>, last access: 8  
813 October 2017, 1993.

814 Xu, H. C., Yu, R. Y., Guo, Z. L., Zhou, C. H., and Ma, D. G.: Study on germination conditions  
815 of *Larix gmelinii* seedlings in Great Xing'an Mountains, *Journal of Beijing Forestry  
816 University*, 12, 15-25, <https://doi.org/10.13332/j.1000-1522.1990.s4.004>, 1990.

817 Xu, H. L., Man, X. L., and Sheng, H. C.: Water conservation function of different types of  
818 *Larix gmelinii* forests in Da Hinggan Mountains, *Research of Soil and Water Conservation*,  
819 18(4), 92-96, available at: [http://www.cnki.com.cn/Article/CJFDTOTAL-](http://www.cnki.com.cn/Article/CJFDTOTAL-STBY201104020.htm)  
820 [STBY201104020.htm](http://www.cnki.com.cn/Article/CJFDTOTAL-STBY201104020.htm), last access: 8 October 2017, 2011a.

821 Xu, H. L., Man, X. L., and Sheng, H. C.: Comprehensive evaluation on water conservation  
822 function of the different types of larch natural forests in Da Hinggan Mountains, *Chinese  
823 Agricultural Science Bulletin*, 29(19), 74-78, available at: [http://www.cnki.com.cn/Article/  
824 CJFDTOTAL-ZNTB201319017.htm](http://www.cnki.com.cn/Article/CJFDTOTAL-ZNTB201319017.htm), last access: 8 October 2017, 2013.

825 Xu, J. L.: Study on *Larix* biomass model and biomass estimation in Dongzhelenghe, Thesis,  
826 available at: <http://cdmd.cnki.com.cn/Article/CDMD-10022-2009161609.htm>, last access:  
827 8 October 2017, 2009.

828 Xu, S. Z. and Han, M. Z.: Regeneration rule and management decision of *Larix gmelinii* in  
829 Genhe regions, in Zhou, X. F. ed., *Long-Term Research on China's Forest Ecosystems*,  
830 709-716, Northeast Forestry University Press, Harbin, China, 1994.

831 Xu, X. T., Wan, D. Y., Wei, D. F., and Zhou, J. Y.: Growth characteristics and techniques for  
832 fast growing and high yield of larch, *Inner Mongolia Forestry Investigation and Design*,  
833 34(6), 54-55, <https://doi.org/10.13387/j.cnki.nmld.2011.06.057>, 2011b.

834 Xu, Y. B., Zhou, Y. Q., Wu, R. X., Liu, Z. S., and Yu, C. H.: Afforestation techniques of *Larix  
835 gmelinii* container seedlings, *Forestry Science & Technology*, 21(3), 5-7, available at:  
836 <http://www.cnki.com.cn/Article/CJFDTOTAL-LYKJ603.001.htm>, last access: 8 October  
837 2017, 1996.

838 Xu, Y. Q.: Study on the geographic variations and selection for the optimal provenances of  
839 *Larix gmelinii*, *Forest Inventory and Planning*, 3, 15-23, available at:  
840 <http://www.cnki.com.cn/Article/CJFDTOTAL-LDGH199303004.htm>, last access: 8

841       October 2017, 1993.

842 Xue, Z. H.: Investigation of larch plantation in Daxing'anling Mountains, Inner Mongolia  
843 Forestry Science and Technology, 2, 18-21, available at: [http://www.cnki.com.cn/Article/  
844 CJFDTOTAL-NMLK198702003.htm](http://www.cnki.com.cn/Article/CJFDTOTAL-NMLK198702003.htm), last access: 8 October 2017, 1987a.

845 Xue, Z. H.: Study on tending and thinning of natural young and middle-age *Larix gmelinii*  
846 forest, Inner Mongolia Forestry Science and Technology, 4, 1-5, available at:  
847 <http://www.cnki.com.cn/Article/CJFDTOTAL-NMLK198704000.htm>, last access: 8  
848 October 2017, 1987b.

849 Xue, Z. H.: Tending and Thinning of *Larix gmelinii* plantation, Inner Mongolia Forestry  
850 Science and Technology, 3, 20-23, 30, available at: [http://www.cnki.com.cn/Article/  
851 CJFDTOTAL-NMLK199003004.htm](http://www.cnki.com.cn/Article/CJFDTOTAL-NMLK199003004.htm), last access: 8 October 2017, 1990.

852 Xue, Z. H.: Cultivation and management techniques of fast-growing and high-yielding *Larix*  
853 *gmelinii* Forests, Inner Mongolia Forestry Science & Technology, 1, 11-18, available at:  
854 <http://www.cnki.com.cn/Article/CJFDTOTAL-NMLK199301004.htm>, last access: 8  
855 October 2017, 1993.

856 Yang, B. L., Jia, Q. B., Zhang, H. G., and Zhang, L.: Research on hybrid larch superior  
857 families selection, Forestry Science & Technology, 39(2), 1-4,  
858 <https://doi.org/10.3969/j.issn.1001-9499.2014.02.001>, 2014.

859 Yang, C. P.: Study on the provenance of Dahurian larch, Science Press, Beijing, China, 2009.

860 Yang, C. P., Jiang, J., Tang, S. S., Li, J. Y. and Wang, H. R.: The provenance test of 21- year  
861 old *Larix gmelinii* at Maoershan Area, Journal of Northeast Forestry University, 30(6), 1-5,  
862 <https://doi.org/10.13759/j.cnki.dlxb.2002.06.001>, 2002.

863 Yang, C. P., Yang, S. W., Xia, D. A., Liu, G. F., Lv, Q. Y. and Zhang, P. G.: Study on the  
864 provenance test of Dahurian Larch (II) Selection of the best provenance, Journal of  
865 Northeast Forestry University, 19, 68-76, <https://doi.org/10.13759/j.cnki.dlxb.1991.s2.011>,  
866 1991.

867 Yang, H. T. and Guo, Y. X.: A primary report on the provenance test of *Larix gmelinii* and  
868 *Larix olgensis* in Huanan forest region, Journal of Northeast Forestry University, 18, 65-71,  
869 <https://doi.org/10.13759/j.cnki.dlxb.1990.s2.010>, 1990.

870 Yang, K., Zhu, J. J., Gu, J. C., Yu, L. Z., and Wang, Z. Q.: Changes in soil phosphorus  
871 fractions after 9 years of continuous nitrogen addition in a *Larix gmelinii* plantation,  
872 Annals of Forest Science, 72, 435-442, <https://doi.org/10.1007/s13595-014-0444-7>, 2015.

873 Yang, L. J., Zhang, C. J., Li, C. H., Jiang, X. L., and Pan, B. L.: Early selection of superior  
874 clone of *Larix gmelinii*, Protection Forest Science and Technology, 4, 35-37,  
875 <https://doi.org/10.13601/j.issn.1005-5215.2006.04.013>, 2006.

876 Yang, S. W. and Shang, L. T.: Research on selection of larch species, Journal of  
877 North-Eastern Forestry Institute, 11(4), 50-56, available at: [http://www.cnki.com.cn/  
878 Article/CJFDTOTAL-DBLY198304006.htm](http://www.cnki.com.cn/Article/CJFDTOTAL-DBLY198304006.htm), last access: 8 October 2017, 1983.

879 Yang, S. W., Wang, Q. Y., Liu, G. F., Yang, C. P., Xia, D. A., and Bao, L. F.: Analysis on the  
880 effects of genetic improvement and the breeding program of larch, Journal of Northeast  
881 Forestry University, 20(1), 1-8, <https://doi.org/10.13759/j.cnki.dlxb.1992.01.001>, 1992.

882 Yang, S. W., Yang, C. P., Wang, Q. Y., Liu, G. F., Xia, D. A., and Zhang, P. G.: The  
883 provenance selection of the important tree species in the northeast part of China and Inner  
884 Mongolia Autonomous Region, Journal of Northeast Forestry University, 21(4), 1-7,

- 885 <https://doi.org/10.13759/j.cnki.dlxb.1993.04.001>, 1993.
- 886 Yang, S. W., Yang, C. P., Zhang, S. Y., Peng, H. M., Li, J. T., Xia, D. A., Liu, G. F., and Wang,  
887 H. R.: A study on the provenance test of *Larix gmelinii* outside of distribution area, Journal  
888 of Northeast Forestry University, 18, 1-8, <https://doi.org/10.13759/j.cnki.dlxb.1990.s2.002>,  
889 1990.
- 890 Yang, Y. B. and Liu, Y. Y.: Discussion about planting fast-growing and high-yield plantation  
891 in the south of Daxing'anling City, Forestry Science and Technology Information, 37(2),  
892 1-2, <https://doi.org/10.3969/j.issn.1009-3303.2005.02.001>, 2005.
- 893 Yao, C. Y., Wang, Q. J., and Gao, G. Y.: Study on growth status of introduced *Larix olgensis*  
894 in Xingan League of Inner Mongolia, Inner Mongolia Forestry Science & Technology, 1,  
895 17-22, available at: <http://www.cnki.com.cn/Article/CJFDTOTAL-NMLK501.004.htm>,  
896 last access: 8 October 2017, 1995.
- 897 Yao, G. Q., Chi, G. Q., Dong, Z. Q., Hu, W. L., and Jiang, J. B.: A study on the growth and  
898 economic effectiveness of four kinds of planted Larch Forest, Journal of Shenyang  
899 Agricultural University, 20, 217-222, available at: [http://www.cqvip.com/QK/93761X/  
900 198903/129531.html](http://www.cqvip.com/QK/93761X/198903/129531.html), last access: 8 October 2017, 1989.
- 901 Yao, Y. J., Chen, X. W., and Li, C. S.: Studies on biomass and productivity for Dahurian larch  
902 plantations, Journal of Northeast Forestry University, 5(2), 13-16,  
903 <https://doi.org/10.1007/BF02843225>, 1994.
- 904 Yu, B. and Wang, L. M.: Analysis on classified stem growing characteristics of *Larix gmelinii*  
905 natural forest, Forest Research, 20(4), 452-457,  
906 <https://doi.org/10.13275/j.cnki.lykxyj.2007.04.014>, 2007.
- 907 Yu, B., Wu, J. S. G. L., Wang, B. T., and Wang, L. M.: Analysis on classified stem  
908 transformation characteristic of *Larix gmelinii* natural forest at Daxingan Mountains, Acta  
909 Ecologica Sinica, 28(11), 5750-5757, <https://doi.org/10.3321/j.issn:1000-0933.2008.11.062>,  
910 2008.
- 911 Yu, B., Wu, J. S. G. L., Wang, B. T., Wang, L. M., and Da, B. X. L. T.: Study on the  
912 distribution pattern characteristics of different stand structures in *Larix gmelinii* natural  
913 forest, Forest Research, 23(1), 83-88, <https://doi.org/10.13275/j.cnki.lykxyj.2010.01.013>,  
914 2010.
- 915 Yu, B., Zang, Q. L., Wang, L. M., and Wu, J. S. G. L.: Characteristics of biomass and  
916 productivity in *Larix gmelinii* natural forests with different stand structures, Journal of  
917 Zhejiang A & F University, 28(1), 52-58, [https://doi.org/10.3969/j.issn.2095-0756.  
918 2011.01.009](https://doi.org/10.3969/j.issn.2095-0756.2011.01.009), 2011.
- 919 Yu, B. J. and Yang, C. P.: Study on provenance test of 5 year old *Larix olgensis*, Journal of  
920 Northeast Forestry University, 16(3), 27-33, [https://doi.org/10.13759/j.cnki.dlxb.  
921 1988.03.005](https://doi.org/10.13759/j.cnki.dlxb.1988.03.005), 1988.
- 922 Yu, S. L. and Yuan, X. G.: Studies on selection of fine families of Hybrid Larch based on  
923 growth traits in seedling stage, Inner Mongolia Forestry Investigation and Design, 32(2),  
924 114-117, <https://doi.org/10.13387/j.cnki.nmld.2009.02.025>, 2009.
- 925 Yuan, G. X., Li, H. X., Chen, G. F., Lou, Y. M., and Mou, Z. J.: Analysis on the introduction  
926 of *Pinus banksiana* Lamb, Forestry Science & Technology, 26(5), 9-10,  
927 <https://doi.org/10.3969/j.issn.1001-9499.2001.05.004>, 2001.
- 928 Yue, Y. J., Gao, R. H., Li, G. T., Jin, J., and Wang, X. F.: Research on community structure

929 and species diversity of *Larix gmelinii* community in Jinhe Forestry Bureau, Journal of  
930 Inner Mongolia Agricultural University, 35(2), 43-47,  
931 <https://doi.org/10.16853/j.cnki.1009-3575.2014.02.010>, 2014.

932 Yue, Y. J., Qu, L. C., Song, L. J., Liu, M. D., Zeng, Y. E., Li, G. T., and Wang, F. S.:  
933 Distribution patterns and diversity of species of *Larix gmelinii* in Kuduer, Journal of Inner  
934 Mongolia Agricultural University, 34(1), 42-47, <https://doi.org/10.16853/j.cnki.1009-3575.2013.01.009>, 2013.

936 Zhai, M. P., Yi, W. L., Jia, L. M., and Ma, L. Y.: Study on the characteristics of *Betula*  
937 *platyphylla-Larix gmelinii* Mixed Forest in Xilinji Forest Region, Journal of Beijing  
938 Forestry University, 12, 86-91, <https://doi.org/10.13332/j.1000-1522.1990.s3.010>, 1990a.

939 Zhai, M. P., Yi, W. L., Jia, L. M., Ma, L. Y., Sun, Y. X., Liu, Z. Y., and Wang, Y. G.:  
940 Investigation of *Betula platyphylla-Larix gmelinii* Mixed Forest in Xilinji Forest Region,  
941 Journal of Beijing Forestry University, 12, 78-85,  
942 <https://doi.org/10.13332/j.1000-1522.1990.s3.009>, 1990b.

943 Zhan, J. and Yang, C. P.: Study on the provenance test of Dahurian larch (*Larix gmelinii*),  
944 Journal of Northeast Forestry University, 17(6), 22-30, available at:  
945 <http://www.cnki.com.cn/Article/CJFDTOTAL-DBLY198906003.htm>, last access: 8  
946 October 2017, 1989.

947 Zhang, G. L., Qu, B. C., Zhang, Y. H., and Wang, H.: Growth analysis and model of *Larix*  
948 *gmelinii* plantation, Protection Forest Science and Technology, 4, 41-43,  
949 <https://doi.org/10.13601/j.issn.1005-5215.2012.04.056>, 2012.

950 Zhang, H. D. and Zhou, M.: Nutrient characteristics of *Larix gmelinii* forest ecosystem in  
951 cold temperate zone, Journal Liaoning Forestry Science & Technology, 3, 5-8, 22,  
952 <https://doi.org/10.3969/j.issn.1001-1714.2014.03.002>, 2014.

953 Zhang, J.: Study on community structure, biomass and carbon storage of *Larix gmelini*  
954 plantation, Thesis, available at: [http://cdmd.cnki.com.cn/Article/CDMD-10022](http://cdmd.cnki.com.cn/Article/CDMD-10022-2008085203.htm)  
955 [-2008085203.htm](http://cdmd.cnki.com.cn/Article/CDMD-10022-2008085203.htm), last access: 8 October 2017, 2008a.

956 Zhang, J., Sun, Y. J., and Xu, J. L.: Research on growing process of *Larix gmelinii* plantation  
957 in Northeast of China, Journal of Northwest Forestry University, 23(6), 179-181, available  
958 at: <http://www.cnki.com.cn/Article/CJFDTOTAL-XBLX200806045.htm>, last access: 8  
959 October 2017, 2008.

960 Zhang, J. L., Mao, Y. Q., Wang, F. S., Liu, L., Wu, C. J., Zhang, H. P., Yuan, L. D., Zhao, W.,  
961 and Wang, F. J.: The progeny testing and fine family selection of *Larix gmelinii* and *Larix*  
962 *olgensis*, Protection Forest Science and Technology, 3, 22-26,  
963 <https://doi.org/10.13601/j.issn.1005-5215.1994.03.003>, 1994.

964 Zhang, L.: Study on stability of families and selection of superior families of hybrid larch.  
965 Thesis, available at: <http://cdmd.cnki.com.cn/Article/CDMD-10225-1011146424.htm>,  
966 last access: 8 October 2017, 2011.

967 Zhang, L. Y.: A study on individual tree health assessment of nature *Larix gmelinii* in  
968 Daxing'anling, Forestry Science and Technology Information, 45(1), 41-43.  
969 <https://doi.org/10.3969/j.issn.1009-3303.2013.01.018>, 2013.

970 Zhang, Q. B. and Fang, L.: A study of problems of planting fast-growing and high-yield  
971 plantation in secondary forest site on the south slope in Great Xing'an Mountain, Journal  
972 of Inner Mongolia Forestry College, 20(3), 37-42, available at: <http://www.cnki.com.cn/>

973 Article/CJFDTOTAL-NMGL803.007.htm, last access: 8 October 2017, 1998.

974 Zhang, S. L., Zhang, H. J., Zhang, W., Guo, Y., Li, X. Z., Zhang, Q., Lu, Y., and Yao, S. P.:  
975 Comparison of water-holding characteristics and biomass of litter under different forest  
976 types in Xiaoxingan Mountains, *Bulletin of Soil and Water Conservation*, 35(4), 85-90,  
977 <https://doi.org/10.13961/j.cnki.stbctb.2015.04.017>, 2015a.

978 Zhang, S. L., Zhang, H. J., Zhang, W., Wang, C. B., Deng, J. H., Song, Y. B., and Zhang, Q.:  
979 Soil hydrological properties of main vegetation in Down South of Xiao Xing'an Mountains,  
980 *Research of Soil and Water Conservation*, 22(1), 140-145,  
981 <https://doi.org/10.13869/j.cnki.rswc.2015.01.027>, 2015b.

982 Zhang, T. W., Yuan, Y. J., Wei, W. S., and Yu, S. L.: The tree-ring chronologies from  
983 Moerdaoga in the northeast of Inner Mongolia, *Journal of Arid Land Resources and  
984 Environment*, 23(12), 177-182, <https://doi.org/10.13448/j.cnki.jalre.2009.12.008>, 2009.

985 Zhang, X. J.: Effect of close-to-nature transformation of Larch Monoculture stands on  
986 regeneration and plant diversity. Thesis, available at: [http://cdmd.cnki.com.cn/Article/](http://cdmd.cnki.com.cn/Article/CDMD-10225-2010242257.htm)  
987 [CDMD-10225-2010242257.htm](http://cdmd.cnki.com.cn/Article/CDMD-10225-2010242257.htm), last access: 8 October 2017, 2010.

988 Zhang, X. J., Wang, Q. C., Wang, S. L., and Sun, Q.: Effect of the close-to-nature  
989 transformation of *Larix gmelinii* pure stands on plant diversity of understory vegetation in  
990 Xiaoxing'an Mountains of China, *Scientia Silvae Sinicae*, 47(1), 6-14,  
991 <https://doi.org/10.11707/j.1001-7488.20110102>, 2011.

992 Zhang, Y. Q.: Transpiration characteristic of Dahurian Larch trees transplanted from a  
993 latitudinal gradient. Thesis, available at: [http://cdmd.cnki.com.cn/Article/CDMD-](http://cdmd.cnki.com.cn/Article/CDMD-10225-2009133900.htm)  
994 [10225-2009133900.htm](http://cdmd.cnki.com.cn/Article/CDMD-10225-2009133900.htm), last access: 8 October 2017, 2008b.

995 Zhao, H. X., Wang, Y. H., Chai, Y. X., Hu, C. X., Li, F. R., and Fan, W. Y.: On forest growth  
996 of northern slope of Daxing'an mountains (Tahe Forest Bureau), *Journal of Northeast  
997 Forestry University*, 24(6), 1-8, <https://doi.org/10.13759/j.cnki.dlxb.1996.06.001>, 1996.

998 Zhao, P. W.: Studies on litterfall dynamics and nutrient release regularity of *Larix gmelinii* in  
999 Great Xingan Mountains. Thesis, <https://doi.org/10.7666/d.y1473822>, 2009.

1000 Zhao, S. J., Yang, J. M., and Bi, X. M.: Study on the fast growing and high yield of larch  
1001 species and the relationships with their introduction districts, *Journal of Hebei Forestry  
1002 Science and Technology*, 2, 2-7, available at: [http://www.cnki.com.cn/Article/](http://www.cnki.com.cn/Article/CJFDTOTAL-HBLK199202001.htm)  
1003 [CJFDTOTAL-HBLK199202001.htm](http://www.cnki.com.cn/Article/CJFDTOTAL-HBLK199202001.htm), last access: 8 October 2017, 1992.

1004 Zhao, X. M., Xu, S. T., Ren, J. Z., Wang, M. Z., Yang, S. M., and Jiang, S. W.: A study on  
1005 provenance test of *Pinus sylvestris L. var mongolica* litvin on Korqin sandy land, *Journal of  
1006 Inner Mongolia Forestry College*, 21(3), 44-49, available at: [http://www.cnki.com.cn/](http://www.cnki.com.cn/Article/CJFDTOTAL-NMGL199903008.htm)  
1007 [Article/CJFDTOTAL-NMGL199903008.htm](http://www.cnki.com.cn/Article/CJFDTOTAL-NMGL199903008.htm), last access: 8 October 2017, 1999.

1008 Zhou, B. D., Hao, W. K., Zou, Q., Zhao, K. M., Liu, Q. L., and Chen, Y. D.: Study on  
1009 artificial regeneration in a clear-cut forest of Xiaoxingan Mountains in Liangshui region,  
1010 *Journal of North-Eastern Forestry College*, 4, 19-35, available at: [http://www.cnki.com.cn/](http://www.cnki.com.cn/Article/CJFDTOTAL-DBLY196500001.htm)  
1011 [Article/CJFDTOTAL-DBLY196500001.htm](http://www.cnki.com.cn/Article/CJFDTOTAL-DBLY196500001.htm), last access: 8 October 2017, 1965.

1012 Zhou, B. Q.: Advices on secondary forest culture on the south slope in Great Xing'an  
1013 Mountain, *Inner Mongolia Forestry Investigation and Design*, 18-20,  
1014 <https://doi.org/10.13387/j.cnki.nmld.1998.s1.008>, 1998.

1015 Zhou, H. X., Zhang, Y. D., Sun, H. L., and Wu, S. Y.: Soil respiration in temperate secondary  
1016 forest and *Larix gmelinii* plantation in Northeast China, *Chinese Journal of Applied*

1017 Ecology, 18(12), 2668-2674, <https://doi.org/10.13287/j.1001-9332.2007.0477>, 2007.

1018 Zhou, J. Q., Liu, X. D., and Guo, H. W.: Surface fuel loading and relevant influencing factors  
1019 of main forest types in southern Daxing'anling, Journal of Northwest A&F  
1020 University(Natural Science Edition), 42(6), 131-137, <https://doi.org/10.13207/j.cnki.jnwafu.2014.06.010>, 2014.

1021

1022 Zhu, H. Y.: Main characters variation among provenances of *Fraxinus mandshurica* Rup.  
1023 Thesis, available at: <http://cdmd.cnki.com.cn/Article/CDMD-10225-2009134220.htm>, last  
1024 access: 8 October 2017, 2008.

1025 Zhu, S. Y., Zhou, B., Mao, Z. J., Wang, X. W., and Sun, Y. F.: Space time dynamics of fine  
1026 root biomass of six forests in Maoershan forest region, Scientia Silvae Sinicae, 42(6),  
1027 13-19, <https://doi.org/10.3321/j.issn:1001-7488.2006.06.003>, 2006.

1028 Zhu, Y.: Forest health assessment of natural *Larix gmelinii* in Great Xing'an Mountains of  
1029 China, Thesis, available at: <http://cdmd.cnki.com.cn/Article/CDMD-10225-1013371221.htm>, last access: 8 October 2017, 2013.

1030

1031 Zhu, Y., Liu, Z. G., and Jin, G. Z.: Health assessment of individual trees in natural *Larix*  
1032 *gmelinii* forest in Great Xing'an Mountains of China, Chinese Journal of Applied Ecology,  
1033 24(5), 1320-1328, <https://doi.org/10.13287/j.1001-9332.2013.0294>, 2013.

1034 Zou, L., Tang, Q. M., and Wang, Y.: Ecological distribution of soil microorganism in pure and  
1035 mixed forests of *Pinus sylvestris* var. *mongolica* and *Larix gmelini*, Journal of Northeast  
1036 Forestry University, 38(11), 63-64, 79, <https://doi.org/10.13759/j.cnki.dlxb.2010.11.029>,  
1037 2010.

1038 Zou, M. L., Xin, Y., and Zhao, Y. S.: The influence of vegetation restoration on carbon  
1039 storage of burned Area in Greater Xing' an Mountains, Journal of Soil and Water  
1040 Conservation, 27(5), 133-137, 143, <https://doi.org/10.13870/j.cnki.stbcxb.2013.05.046>,  
1041 2013.
